# Supplementary material for: 2-Oxabutane as a substitute for internal monomer units of oligosaccharides to create lectin ligands
Source: Royal Society of Chemistry journal article supplement (doi:10.1039/c1ob05775h), 2011-01-01
Supplement: c1ob05775h.pdf [file c1ob05775h.pdf]

## Supplementary Information

2-Oxabutane as a substitute for internal monomer units of oligosaccharides to create lectin ligands

Li-Ying Yang, Yuki Kawada, Lina Bai, Daijiro Kubota, and Hideya Yuasa\*

Department of Life Science, Graduate School of Bioscience and Biotechnology, Tokyo Institute of Technology  
J2-10, 4259 Nagatsutacho, Midoriku, Yokohama 226-8501 Japan,

### Table of contents

|                                                      |    |
|------------------------------------------------------|----|
| Fig S1. <sup>1</sup> H NMR of compound <b>4</b> .    | 2  |
| Fig S2. <sup>13</sup> C NMR of compound <b>4</b> .   | 3  |
| Fig S3. <sup>1</sup> H NMR of compound <b>6</b> .    | 4  |
| Fig S4. <sup>13</sup> C NMR of compound <b>6</b> .   | 5  |
| Fig S5. <sup>1</sup> H NMR of compound <b>7</b> .    | 6  |
| Fig S6. <sup>13</sup> C NMR of compound <b>7</b> .   | 7  |
| Fig S7. <sup>1</sup> H NMR of compound <b>9</b> .    | 8  |
| Fig S8. <sup>13</sup> C NMR of compound <b>9</b> .   | 9  |
| Fig S9. <sup>1</sup> H NMR of compound <b>10</b> .   | 10 |
| Fig S10. <sup>13</sup> C NMR of compound <b>10</b> . | 11 |
| Fig S11. <sup>1</sup> H NMR of compound <b>12</b> .  | 12 |
| Fig S12. <sup>13</sup> C NMR of compound <b>12</b> . | 13 |
| Fig S13. <sup>1</sup> H NMR of compound <b>13</b> .  | 14 |
| Fig S14. <sup>13</sup> C NMR of compound <b>13</b> . | 15 |
| Fig S15. <sup>1</sup> H NMR of compound <b>15</b> .  | 16 |
| Fig S16. <sup>13</sup> C NMR of compound <b>15</b> . | 17 |
| Fig S17. <sup>1</sup> H NMR of compound <b>17</b> .  | 18 |
| Fig S18. <sup>13</sup> C NMR of compound <b>17</b> . | 19 |
| Fig S18. <sup>13</sup> C NMR of compound <b>17</b> . | 20 |
| Fig S19. <sup>1</sup> H NMR of compound <b>18</b> .  | 21 |
| Fig S20. <sup>13</sup> C NMR of compound <b>18</b> . | 22 |
| Fig S21. <sup>1</sup> H NMR of compound <b>20</b> .  | 23 |
| Fig S22. <sup>13</sup> C NMR of compound <b>20</b> . | 24 |
| Fig S23. <sup>1</sup> H NMR of compound <b>22</b> .  | 25 |
| Fig S24. <sup>13</sup> C NMR of compound <b>22</b> . | 26 |
| Fig S25. <sup>1</sup> H NMR of compound <b>23</b> .  | 27 |
| Fig S26. <sup>13</sup> C NMR of compound <b>23</b> . | 28 |

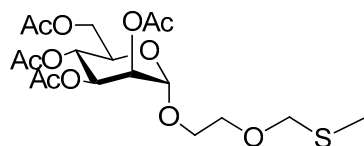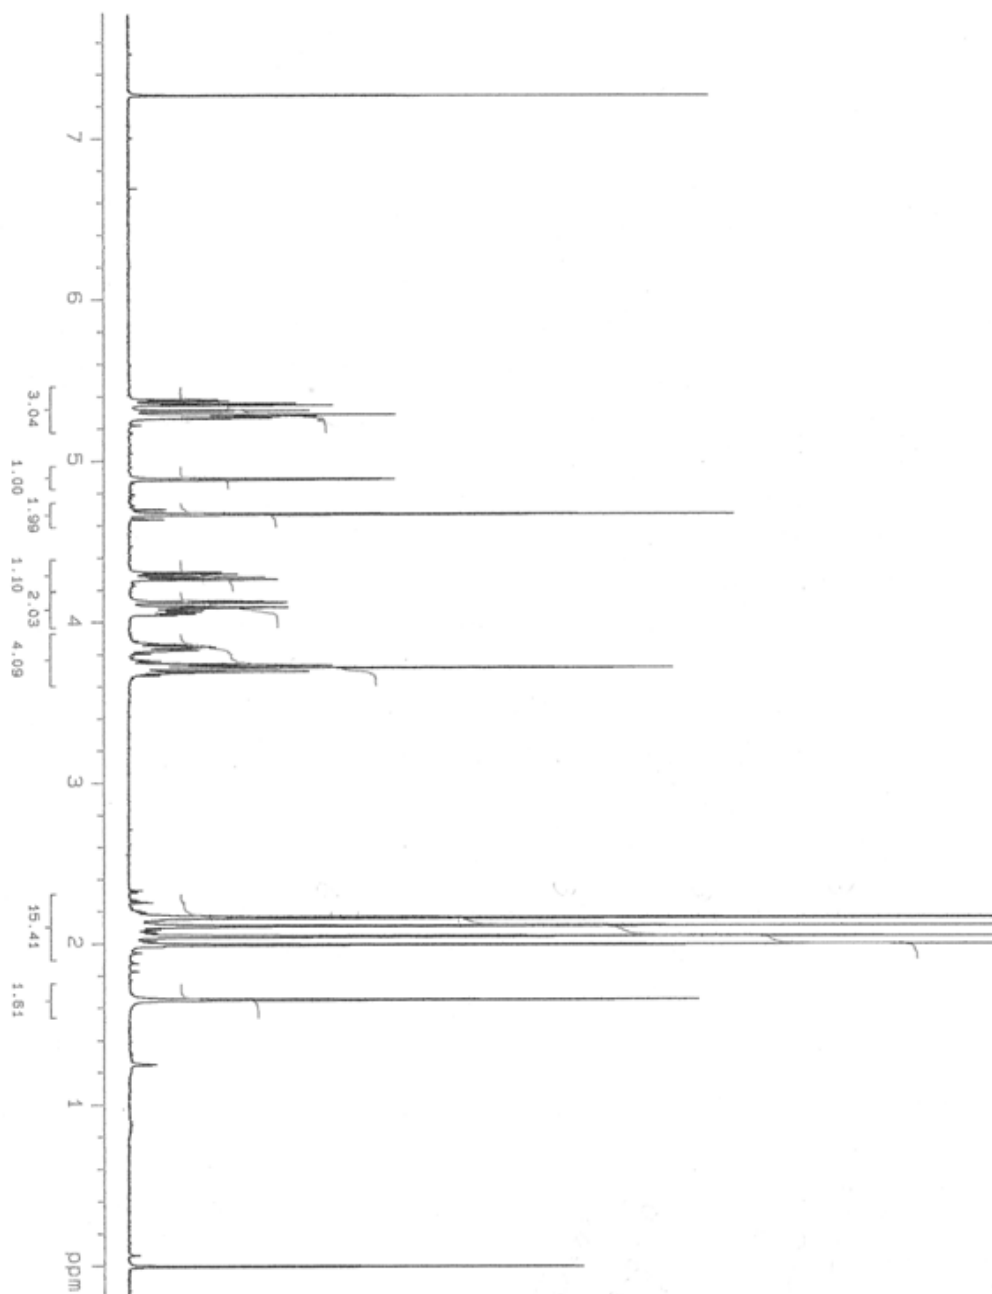

Fig S1.  $^1\text{H}$  NMR of compound 4.

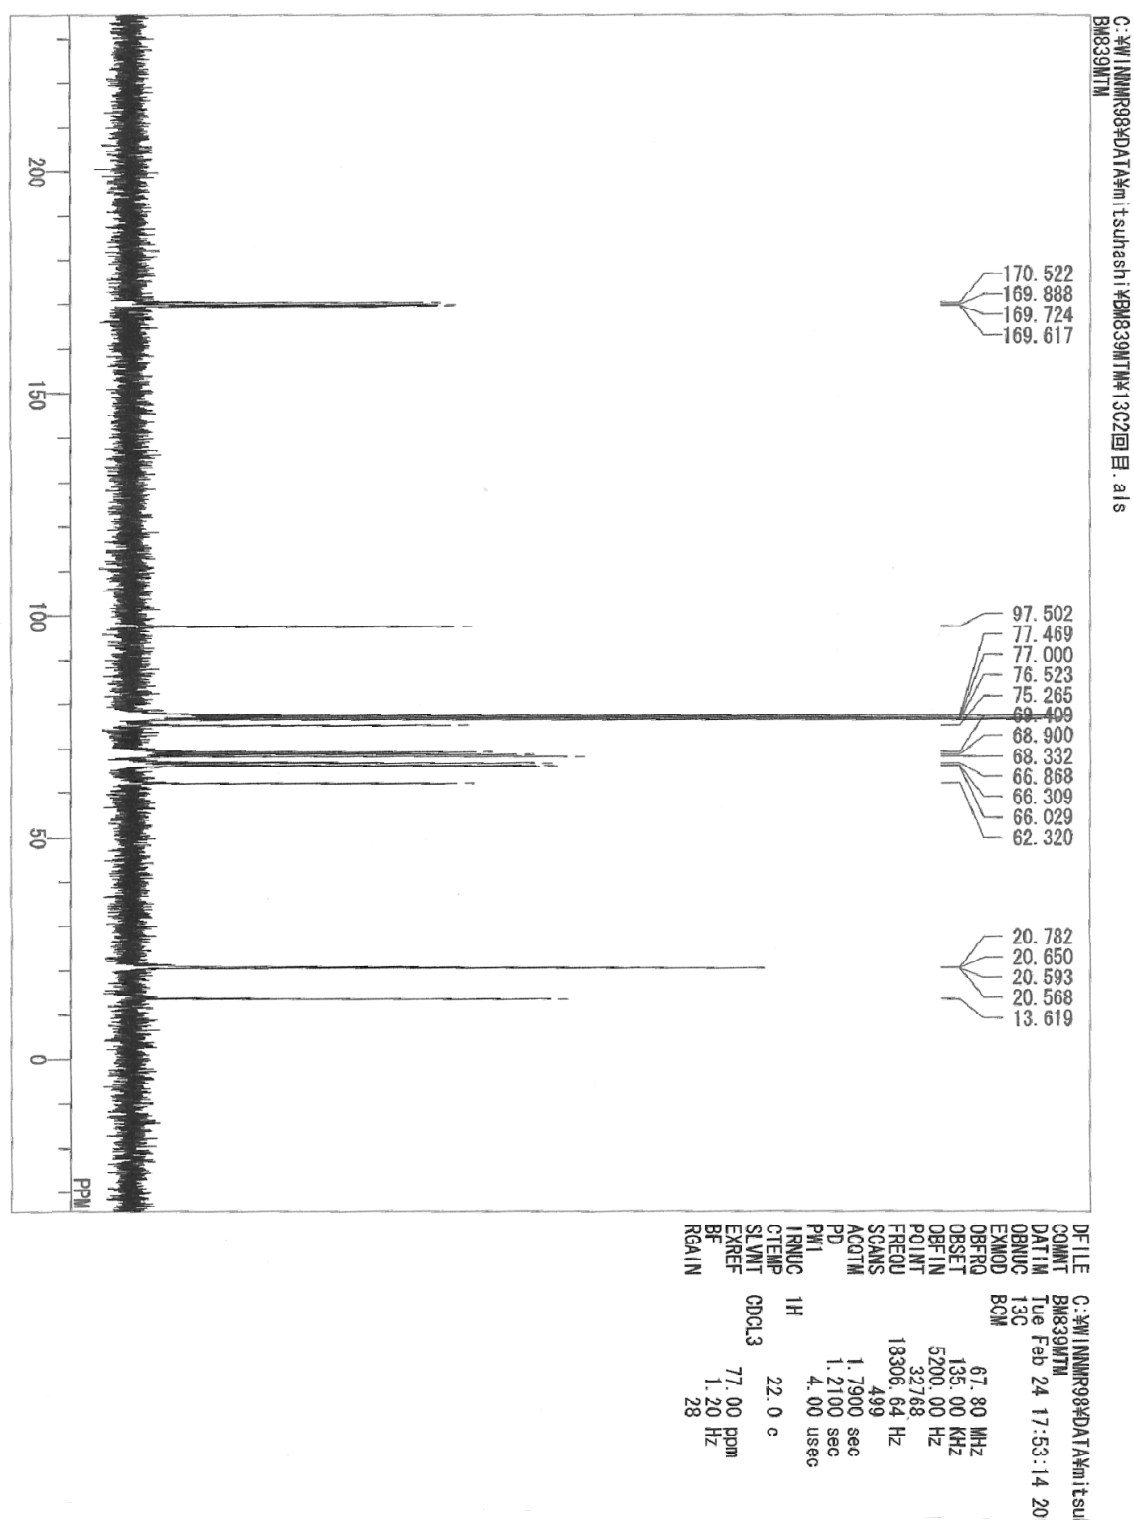

Fig S2.  $^{13}\text{C}$  NMR of compound 4.

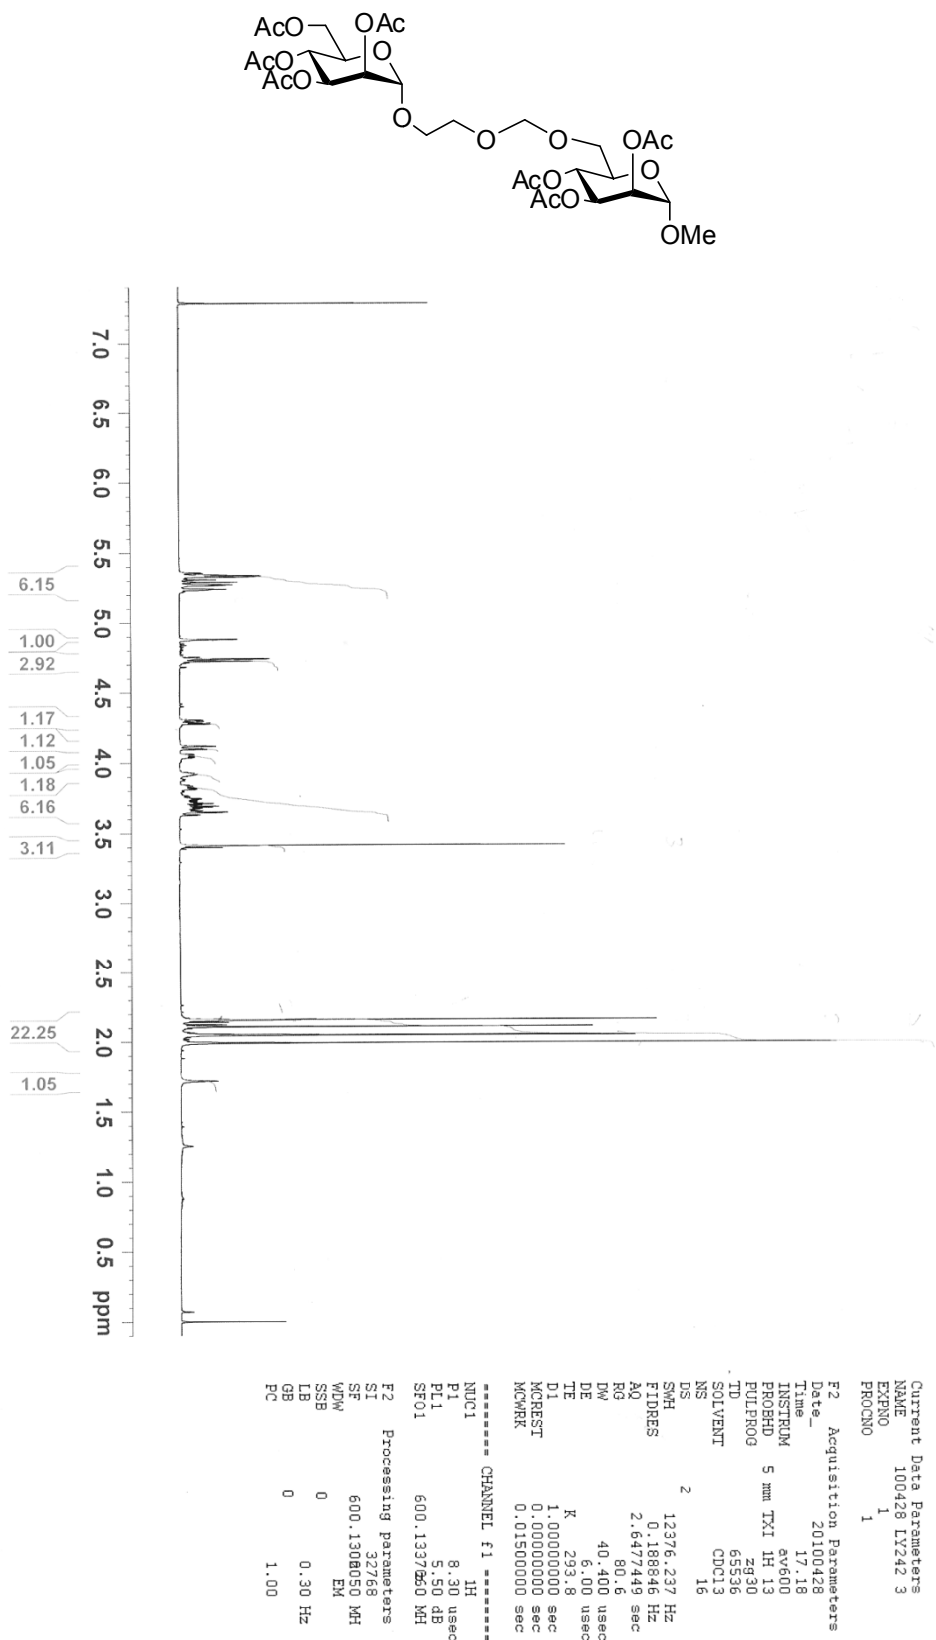

Fig S3. <sup>1</sup>H NMR of compound 6.

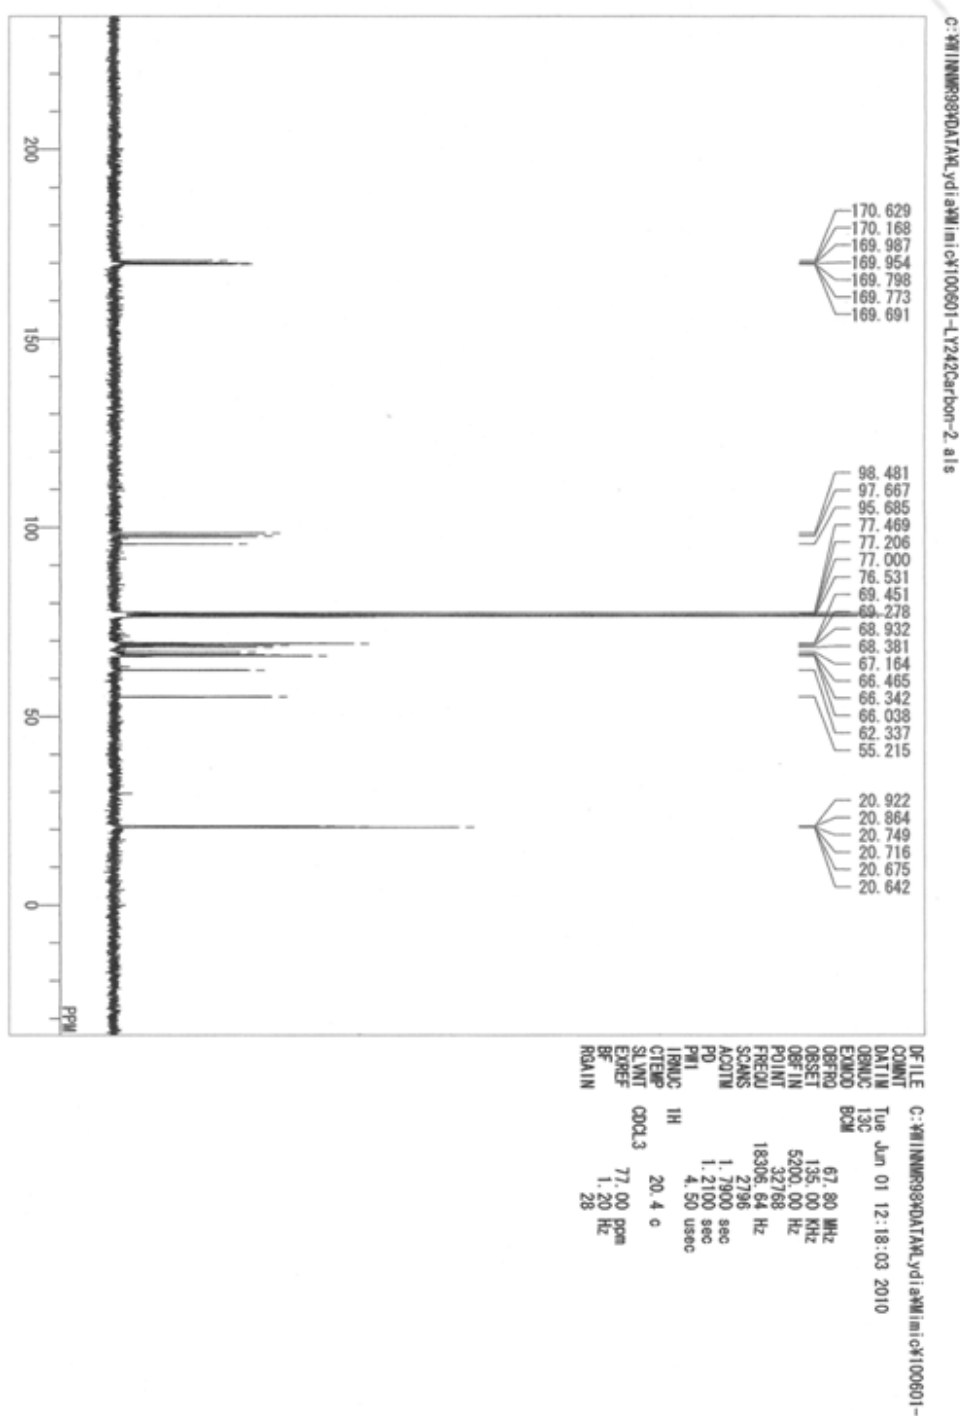

Fig S4. <sup>13</sup>C NMR of compound 6.

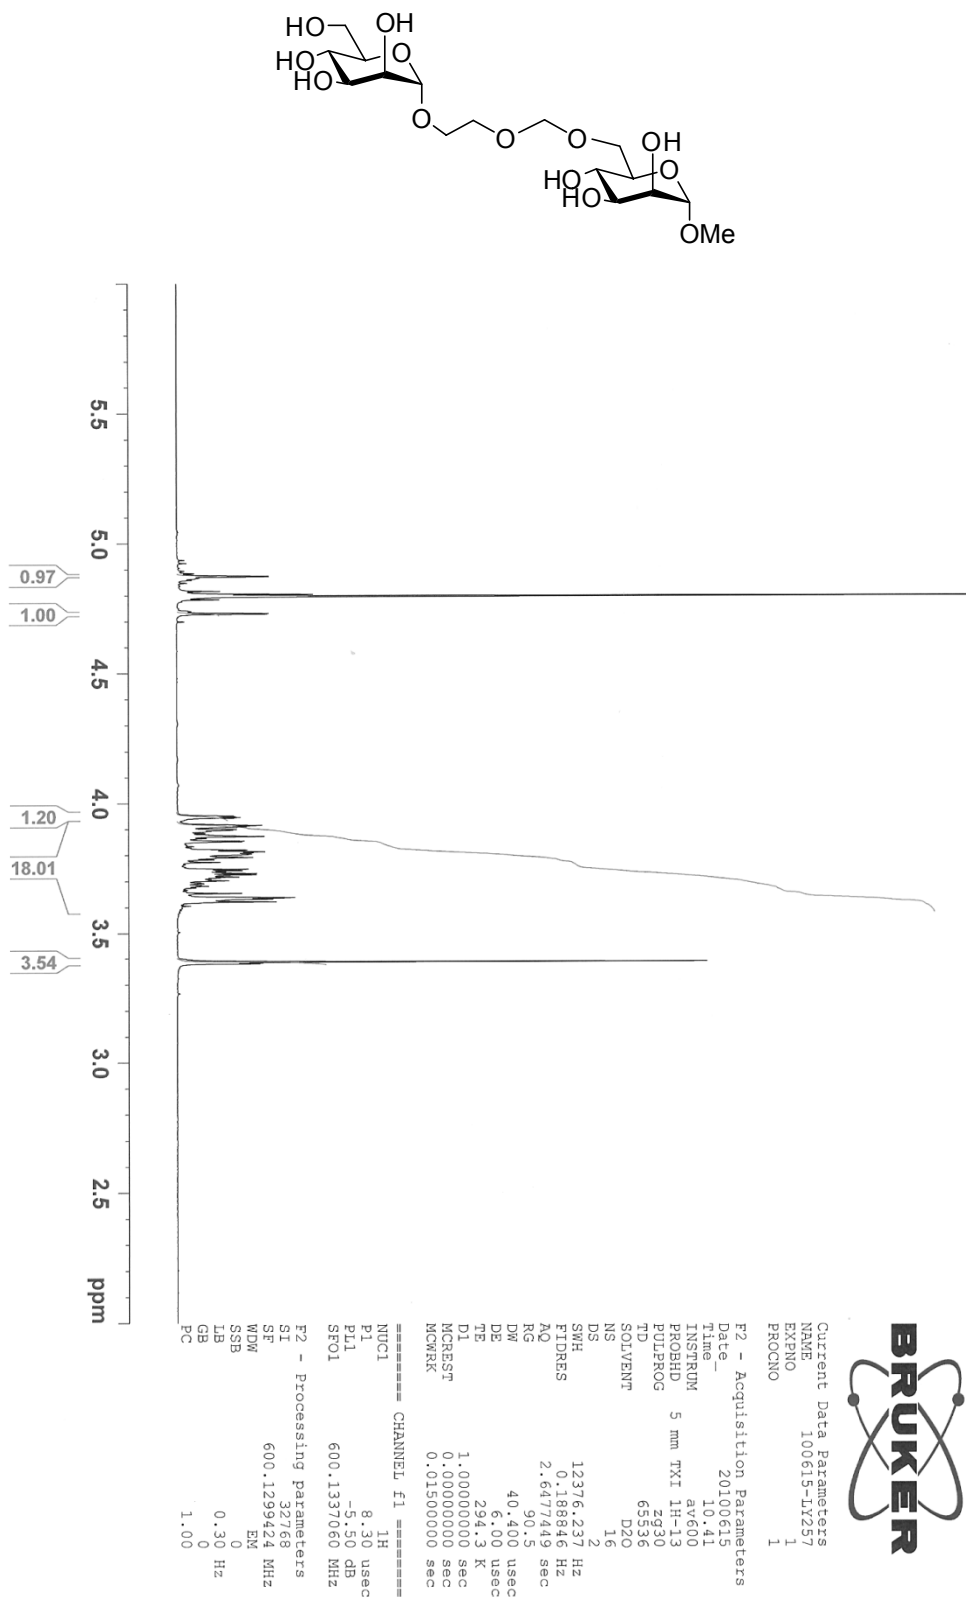

Fig S5. <sup>1</sup>H NMR of compound 7.

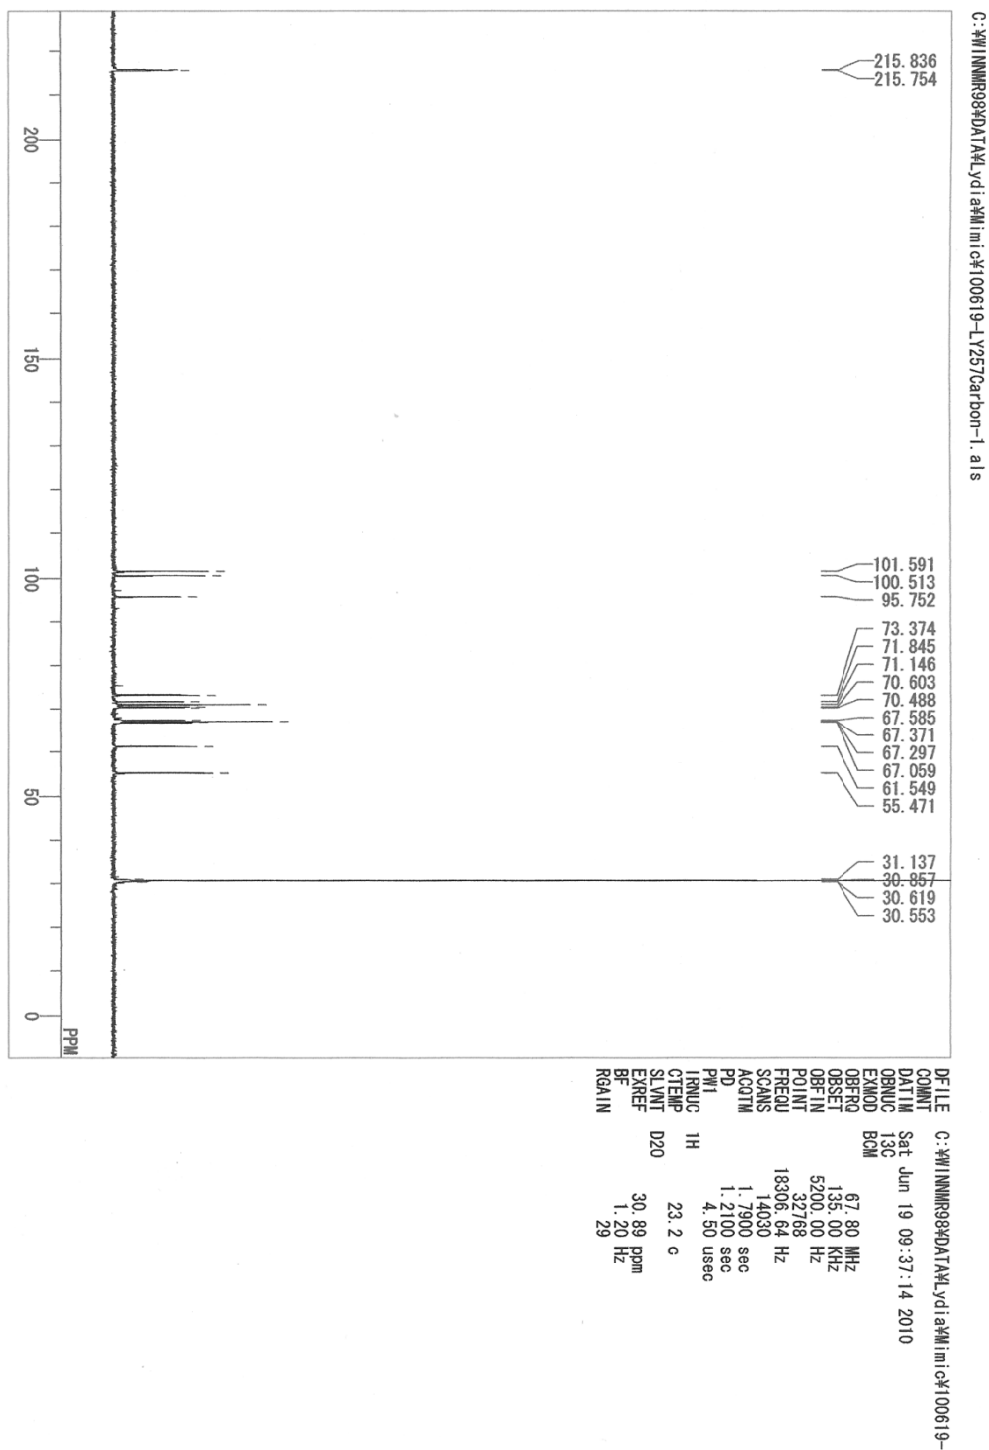

Fig S6. <sup>13</sup>C NMR of compound 7.

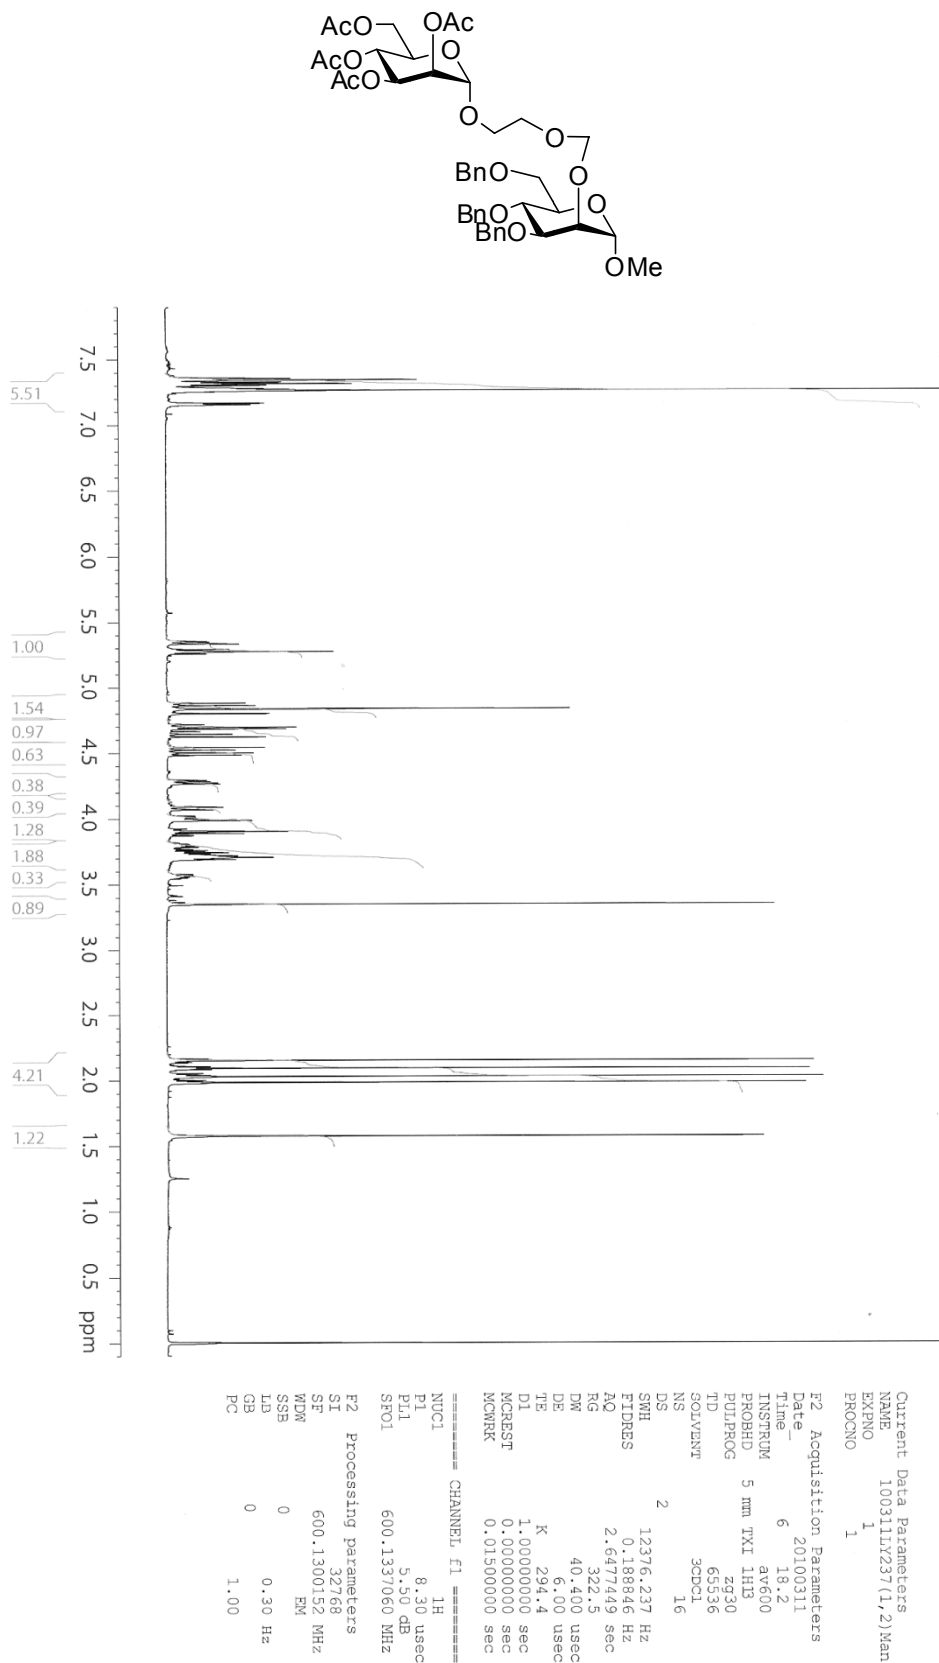

Fig S7. <sup>1</sup>H NMR of compound 9.



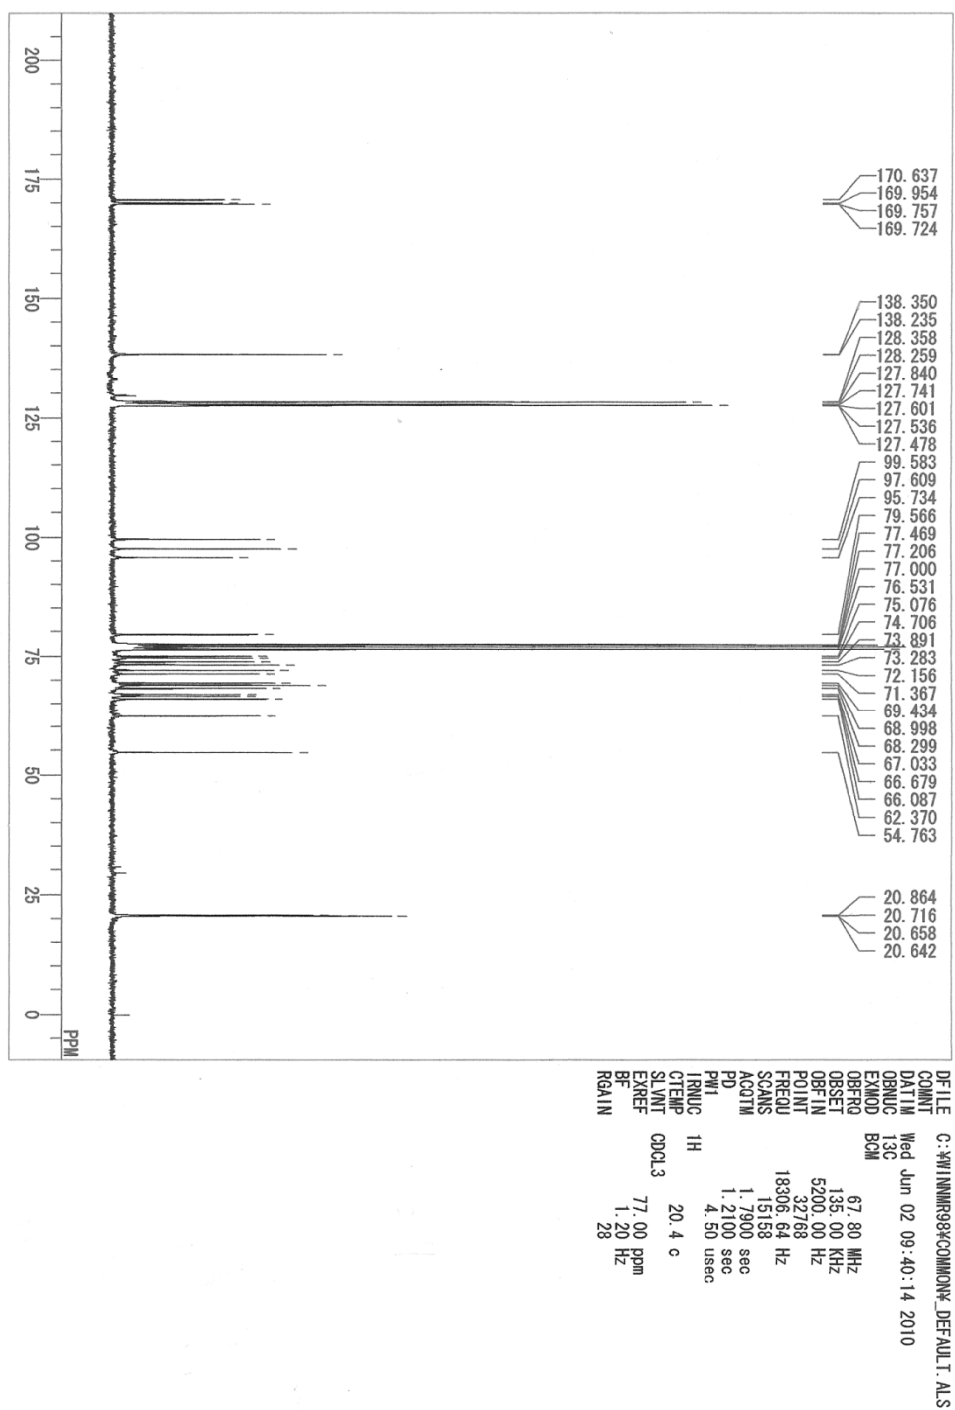

Fig S8.  $^{13}\text{C}$  NMR of compound 9.

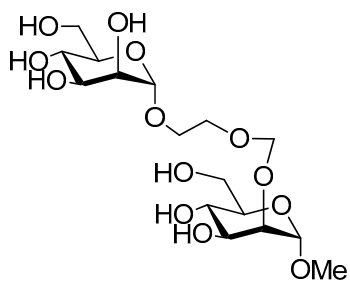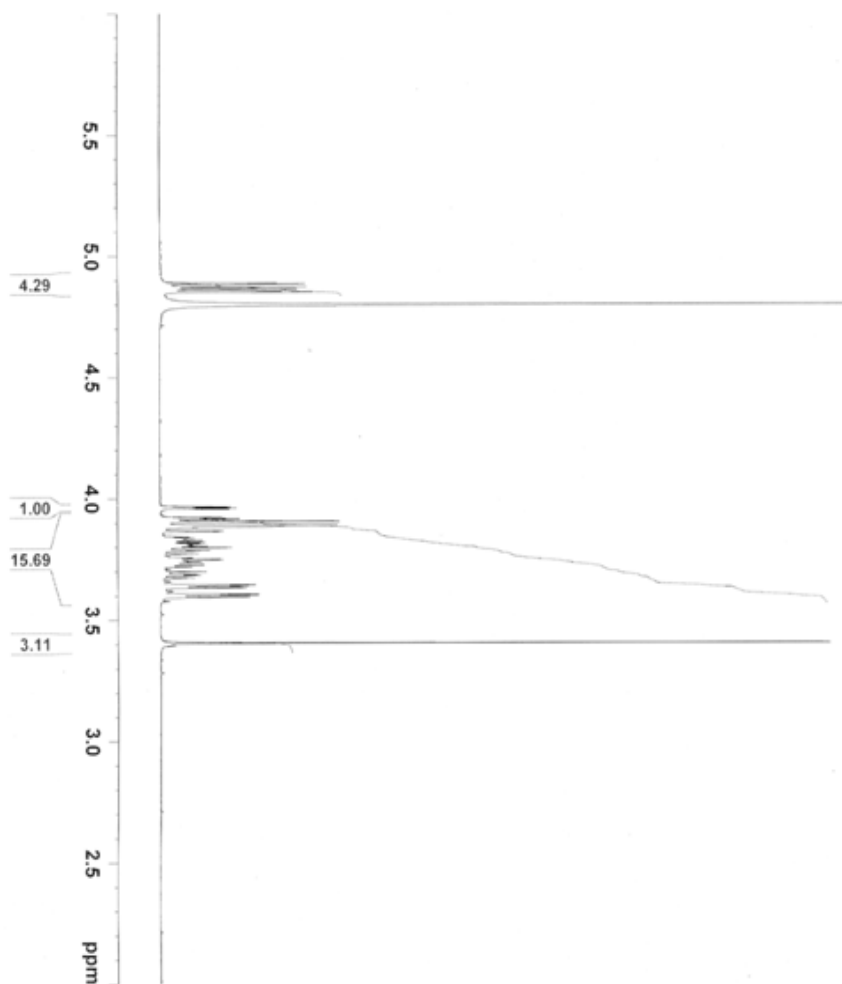

```
Current Date Parameters
NAME      100708 19260
EXPNO     1
PROCNO    1
----- Acquisition Parameters
Date_     20100708
Time      11:46
INSTRUM   spect
PROBHD    5 mm TXI H1
PULPROG   zgpg30
TD         65536
SOLVENT   D2O
NS         16
DS         2
SWH        12376.237 Hz
FIDRES     0.188846 Hz
AQ         2.6477449 sec
RG         6
DE         40.400 usec
TE         101.
K          295.6
D1         1.00000000 sec
MCREST     0.00000000 sec
MCMWF      0.01500000 sec
----- CHANNEL f1 -----
NUC1       1H
P1         9.30 usec
PL1        5.50 dB
SFO1       600.1337060 MHz
----- Processing parameters
SI         32768
SF         600.1299420 MHz
WDW        EM
SSB        0
LB         0.30 Hz
GB         0
PC         1.00
```

Fig S9. <sup>1</sup>H NMR of compound 10.

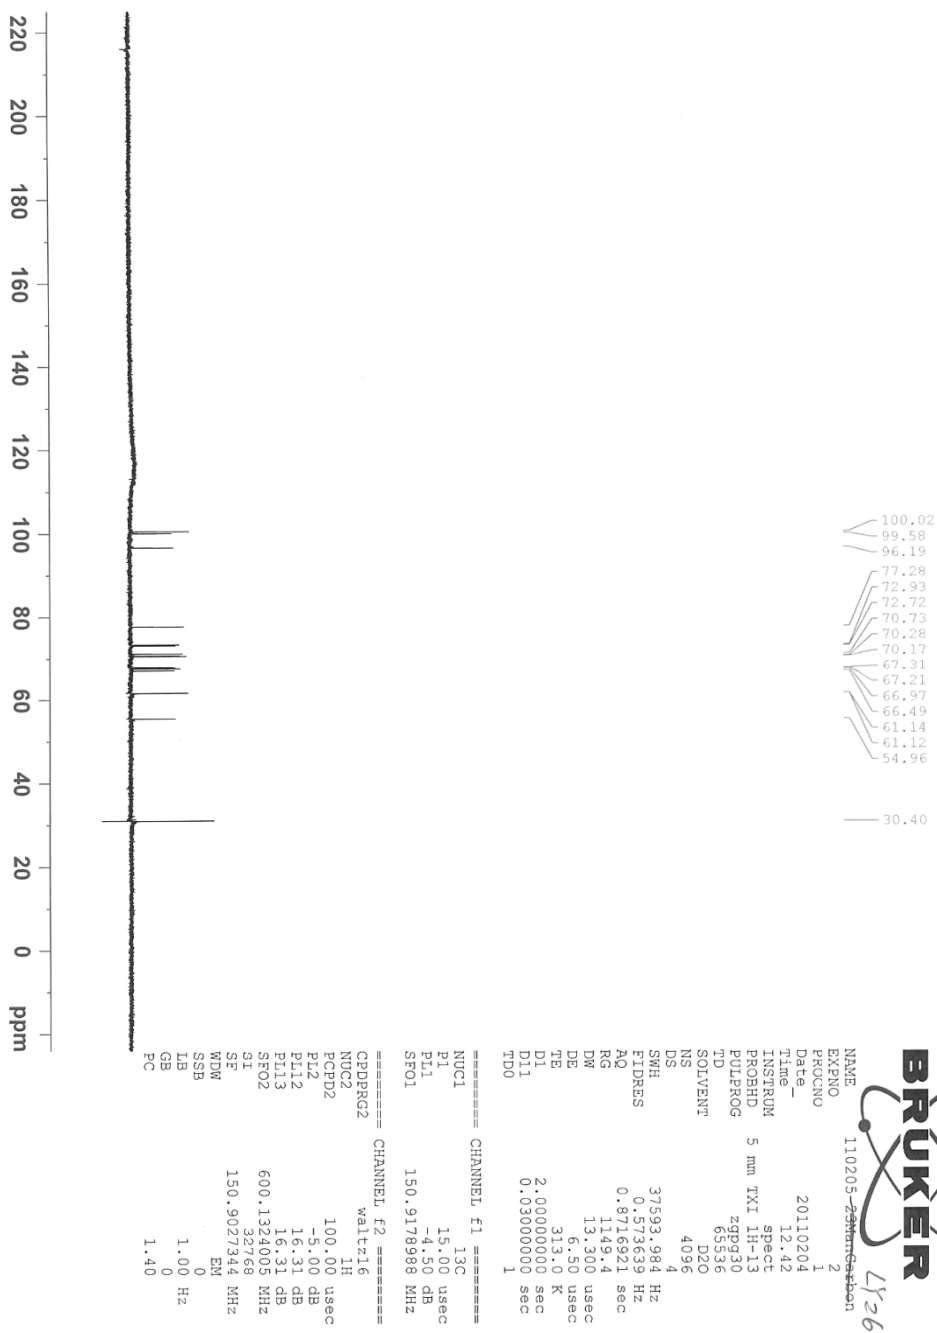

Fig S10. <sup>13</sup>C NMR of compound 10.

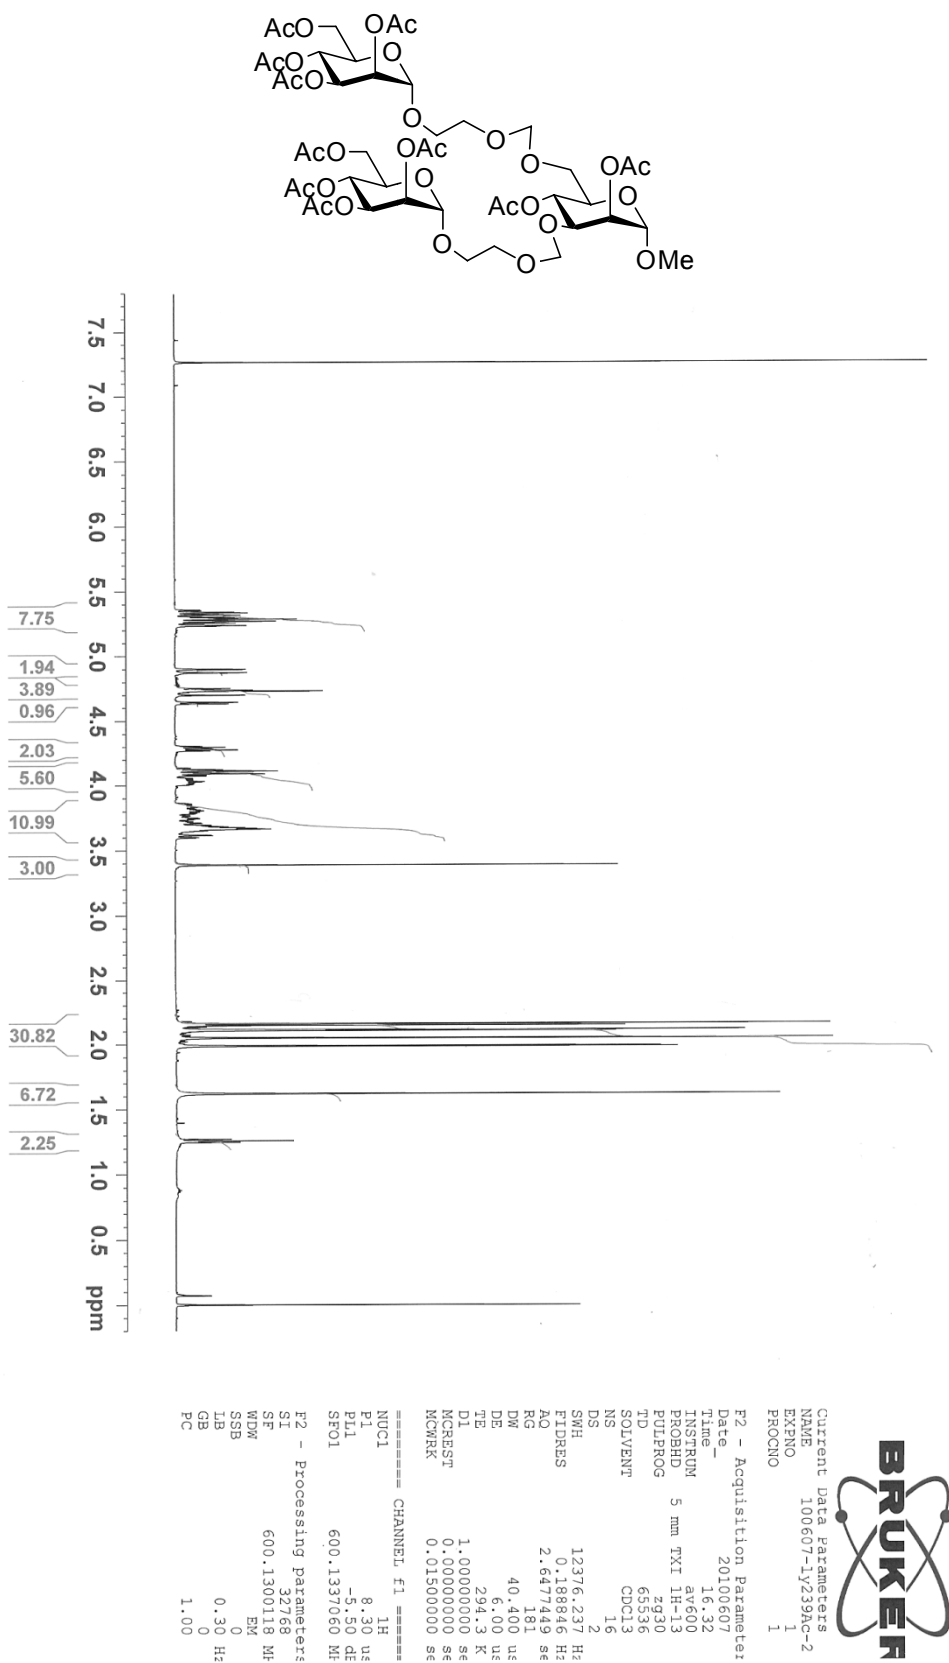

Fig S11. <sup>1</sup>H NMR of compound 12.

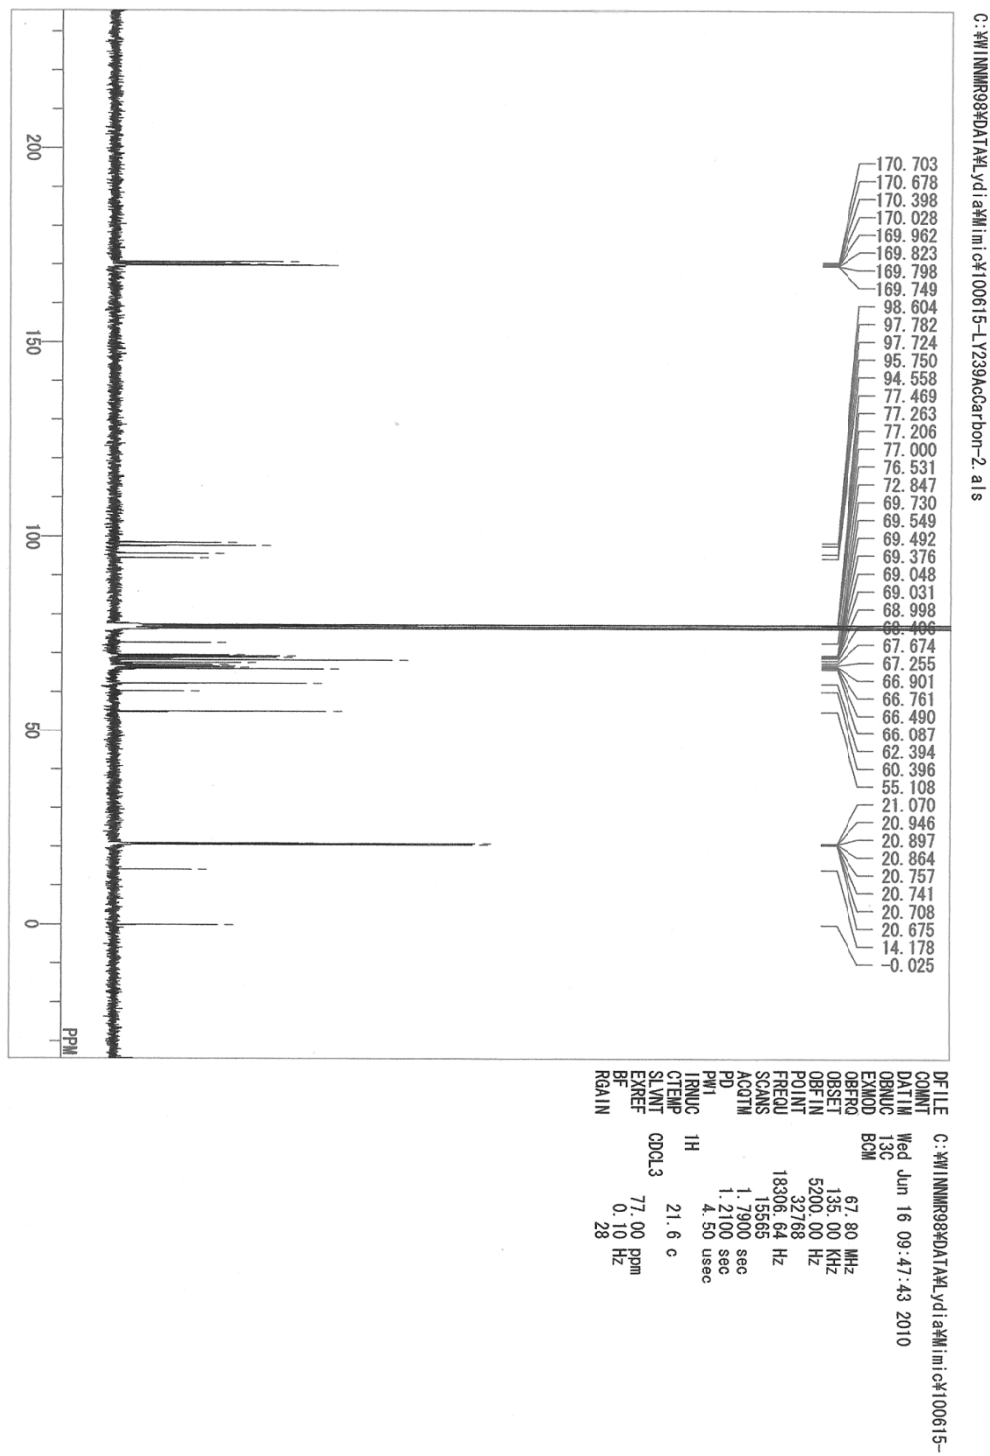

Fig S12. <sup>13</sup>C NMR of compound 12.

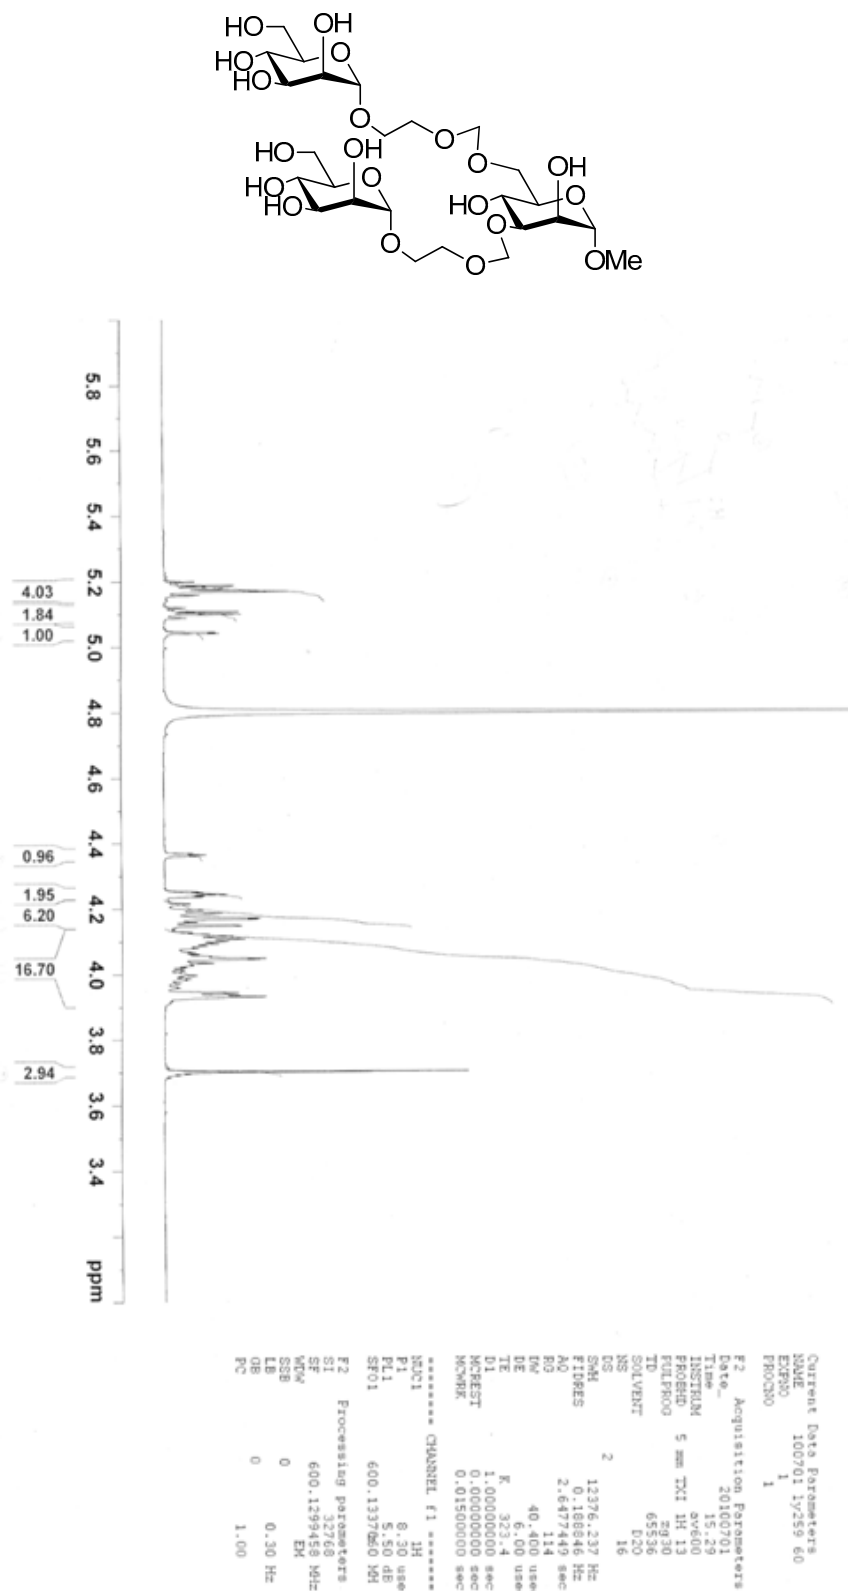

Fig S13. <sup>1</sup>H NMR of compound 13.

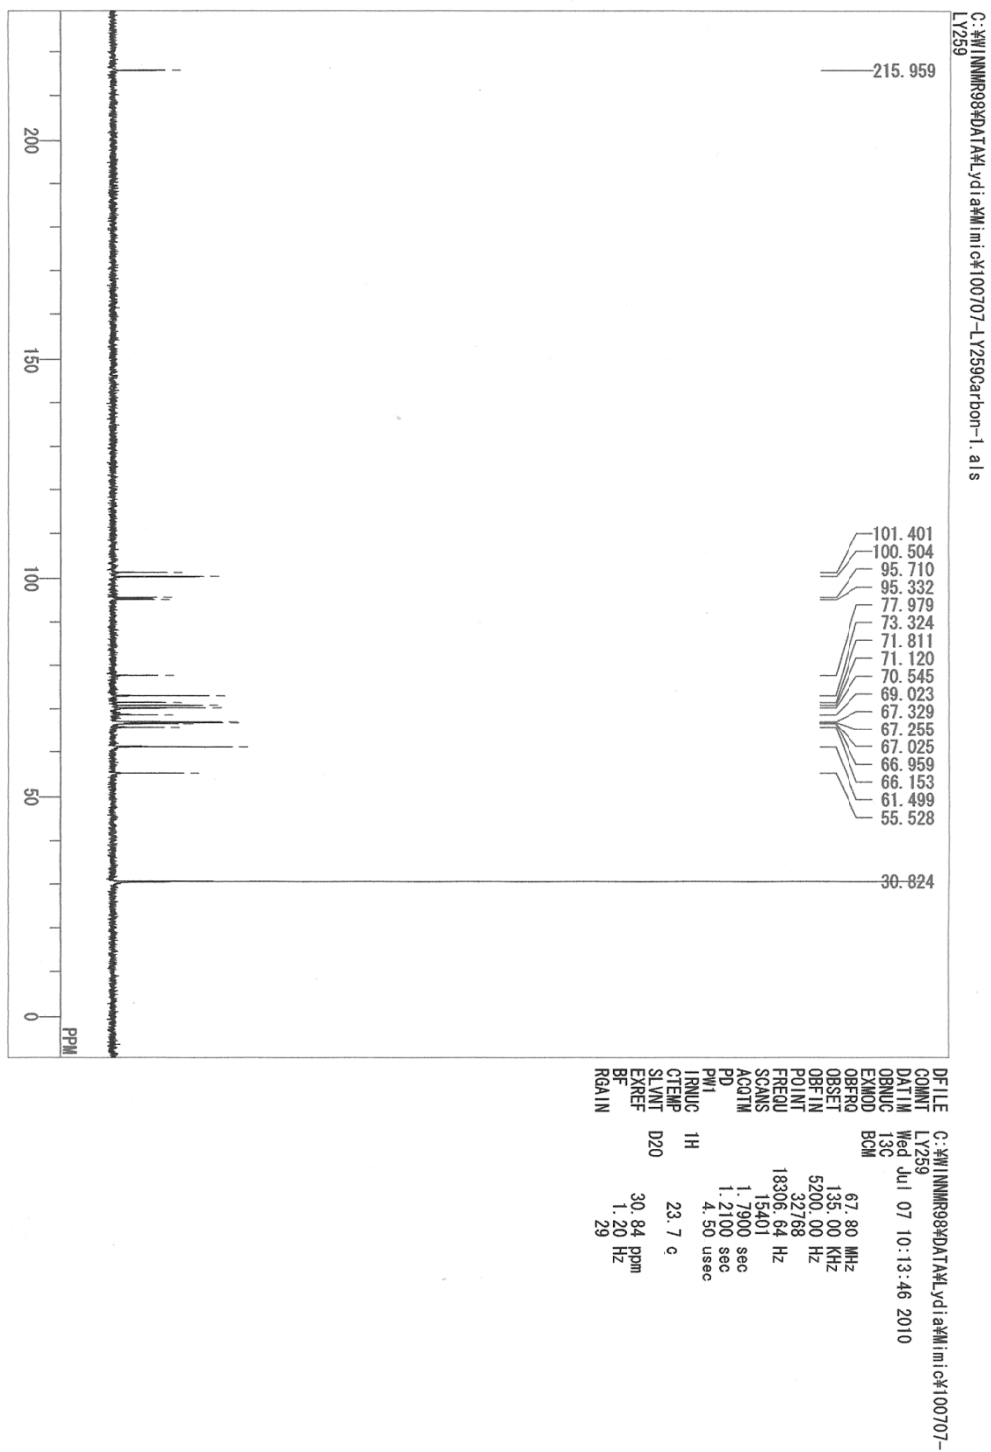

Fig S14.  $^{13}\text{C}$  NMR of compound 13.

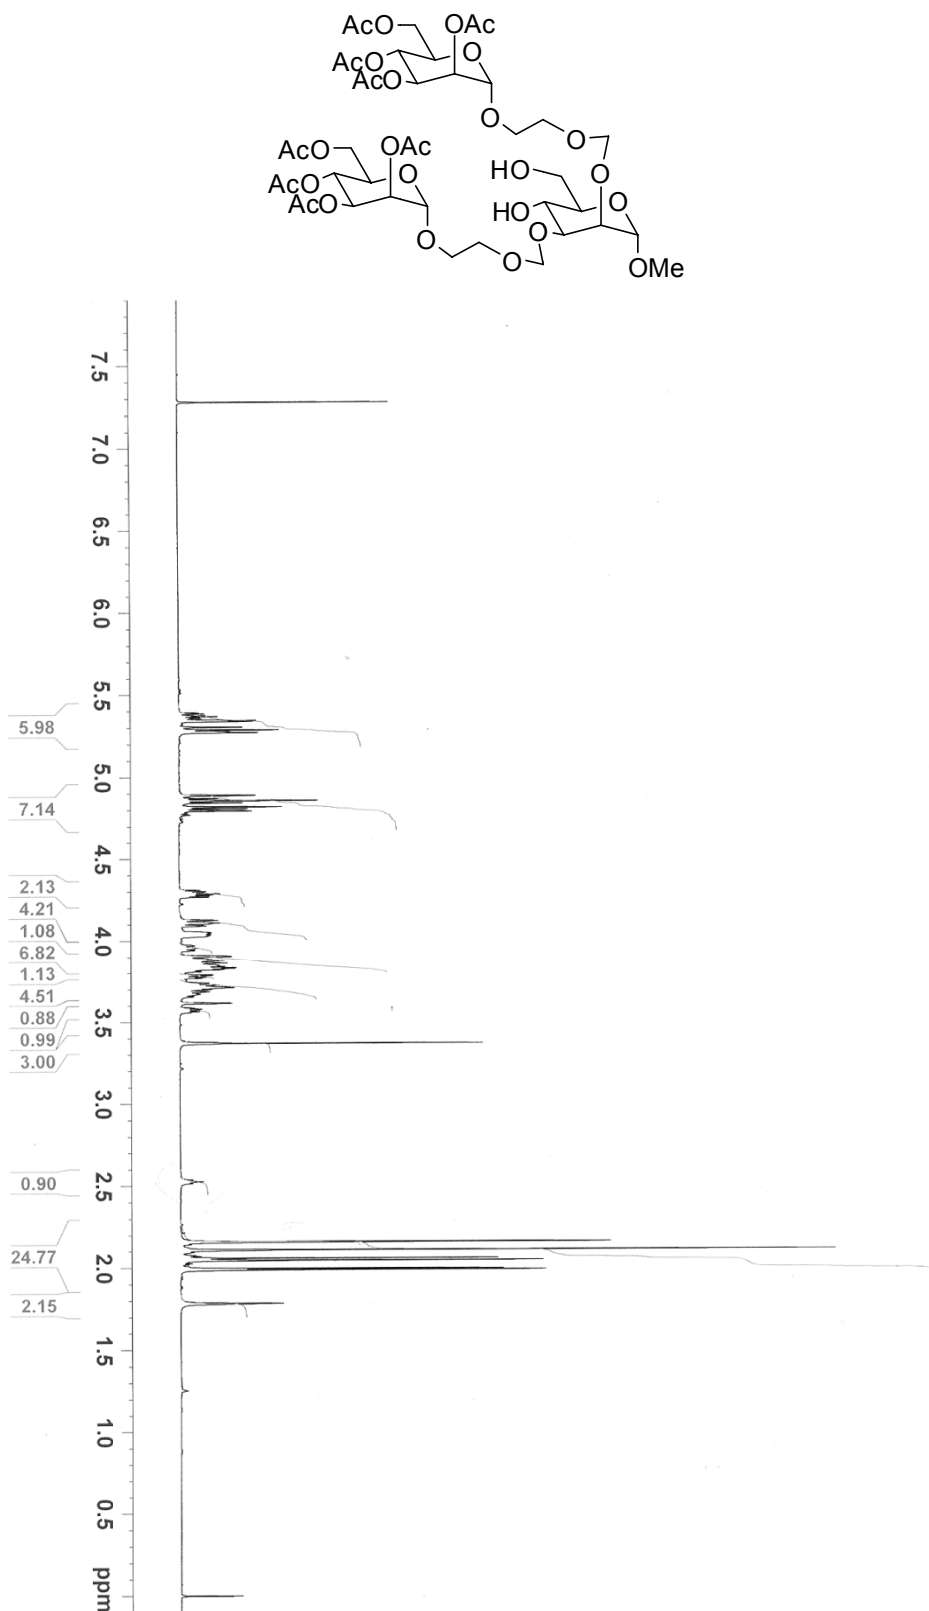

Fig S15. <sup>1</sup>H NMR of compound 15.



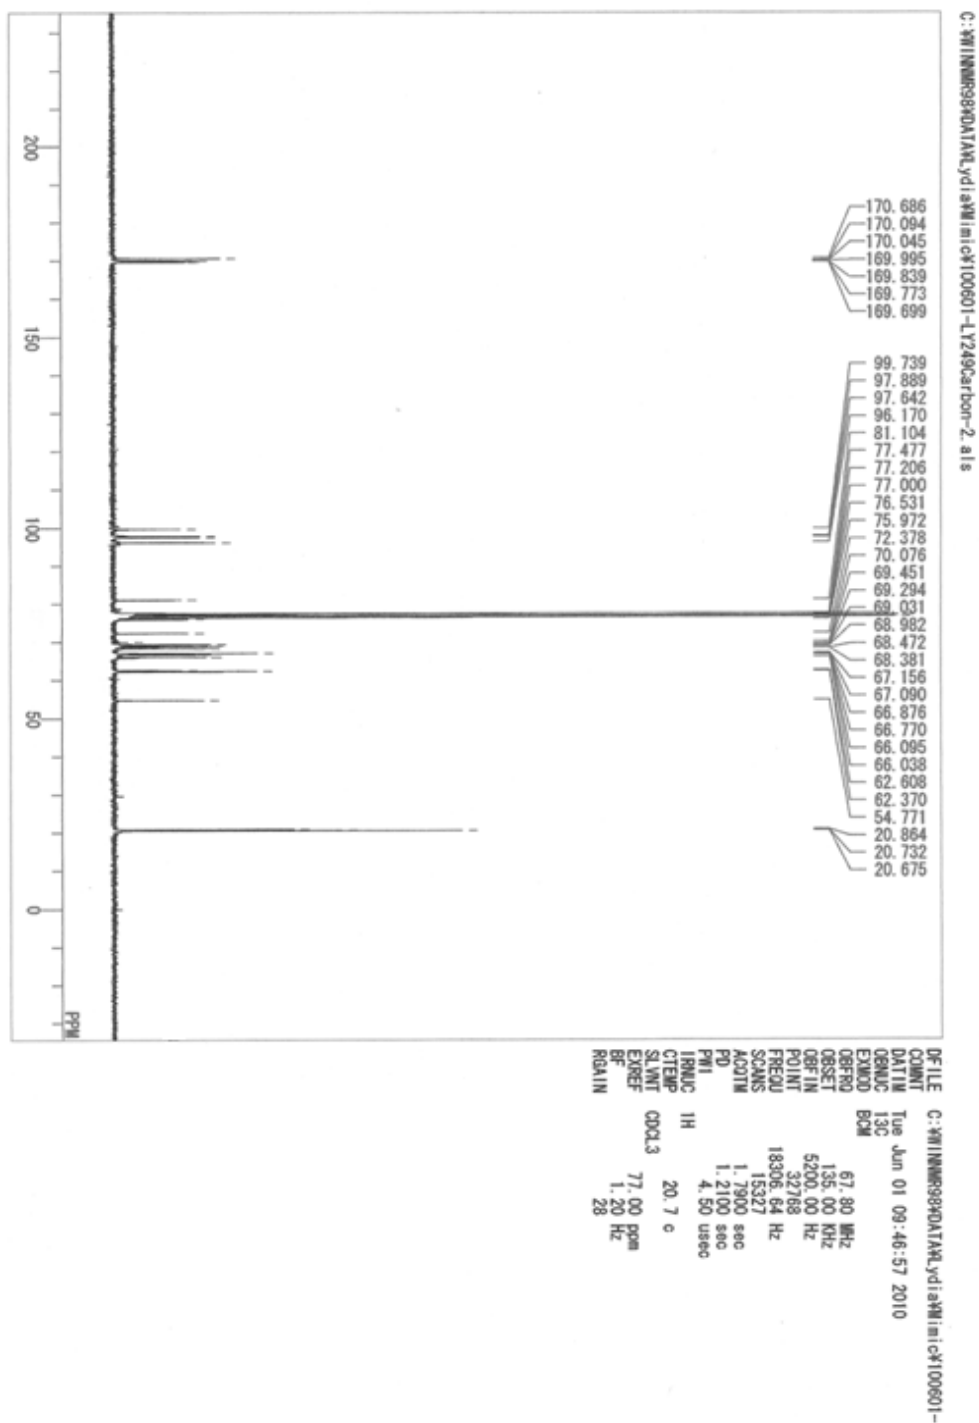

Fig S16. <sup>13</sup>C NMR of compound 15.

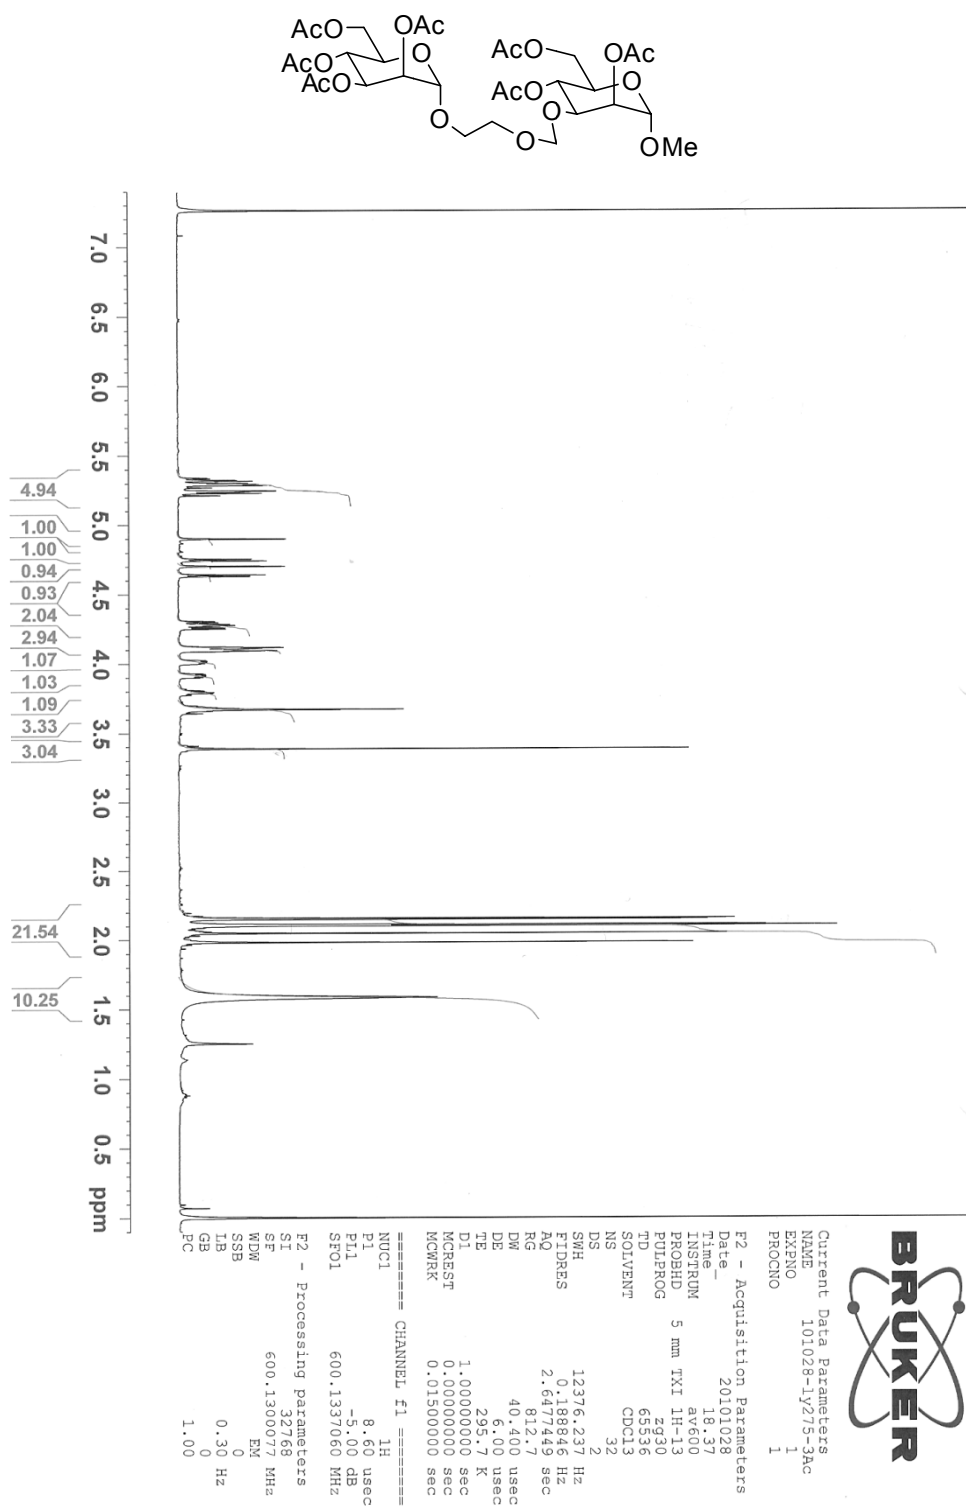

Fig S17. <sup>1</sup>H NMR of compound 17.

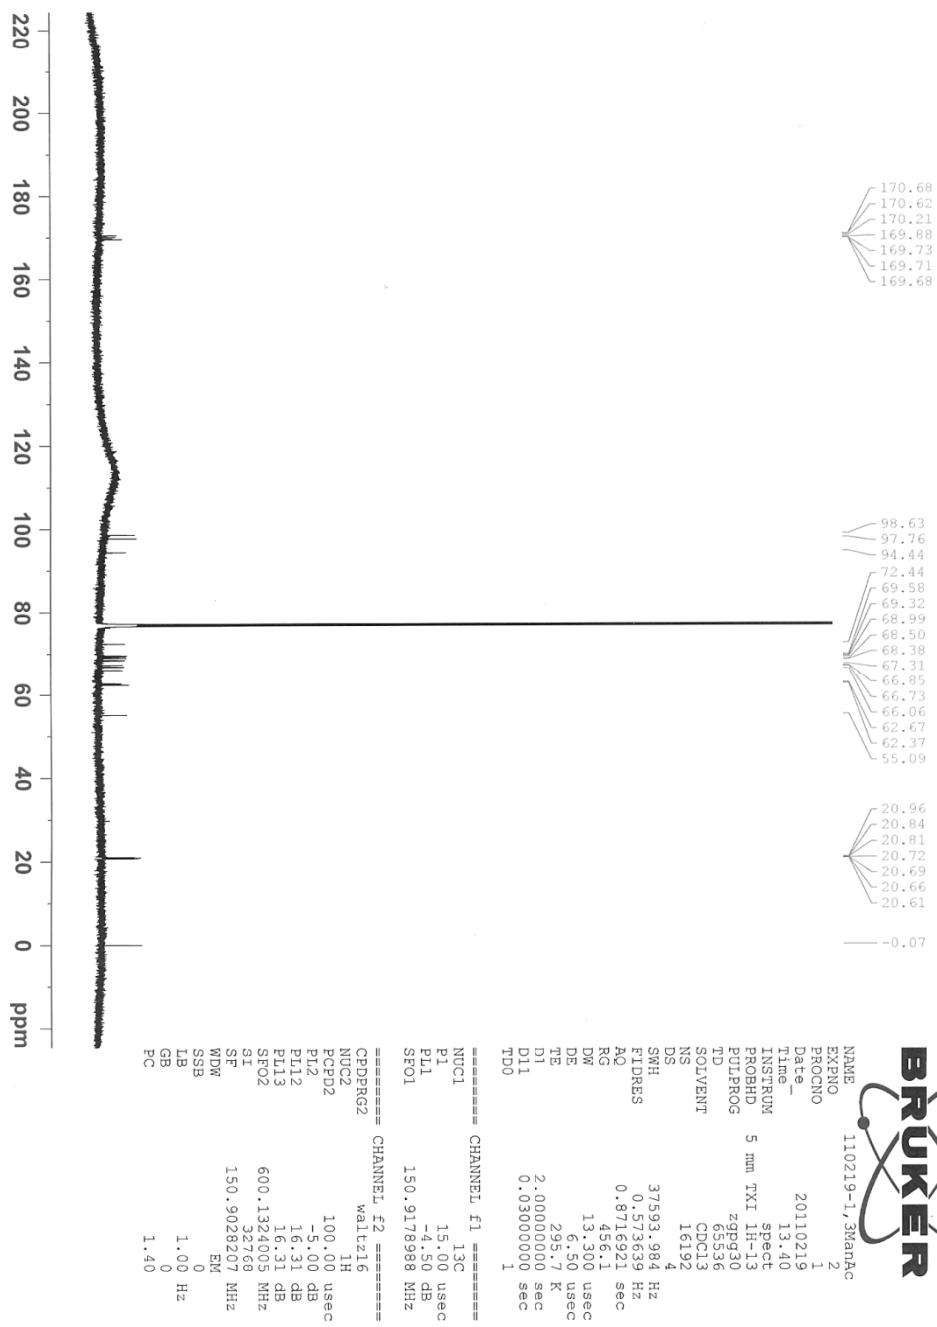

Fig S18.  $^{13}\text{C}$  NMR of compound 17.

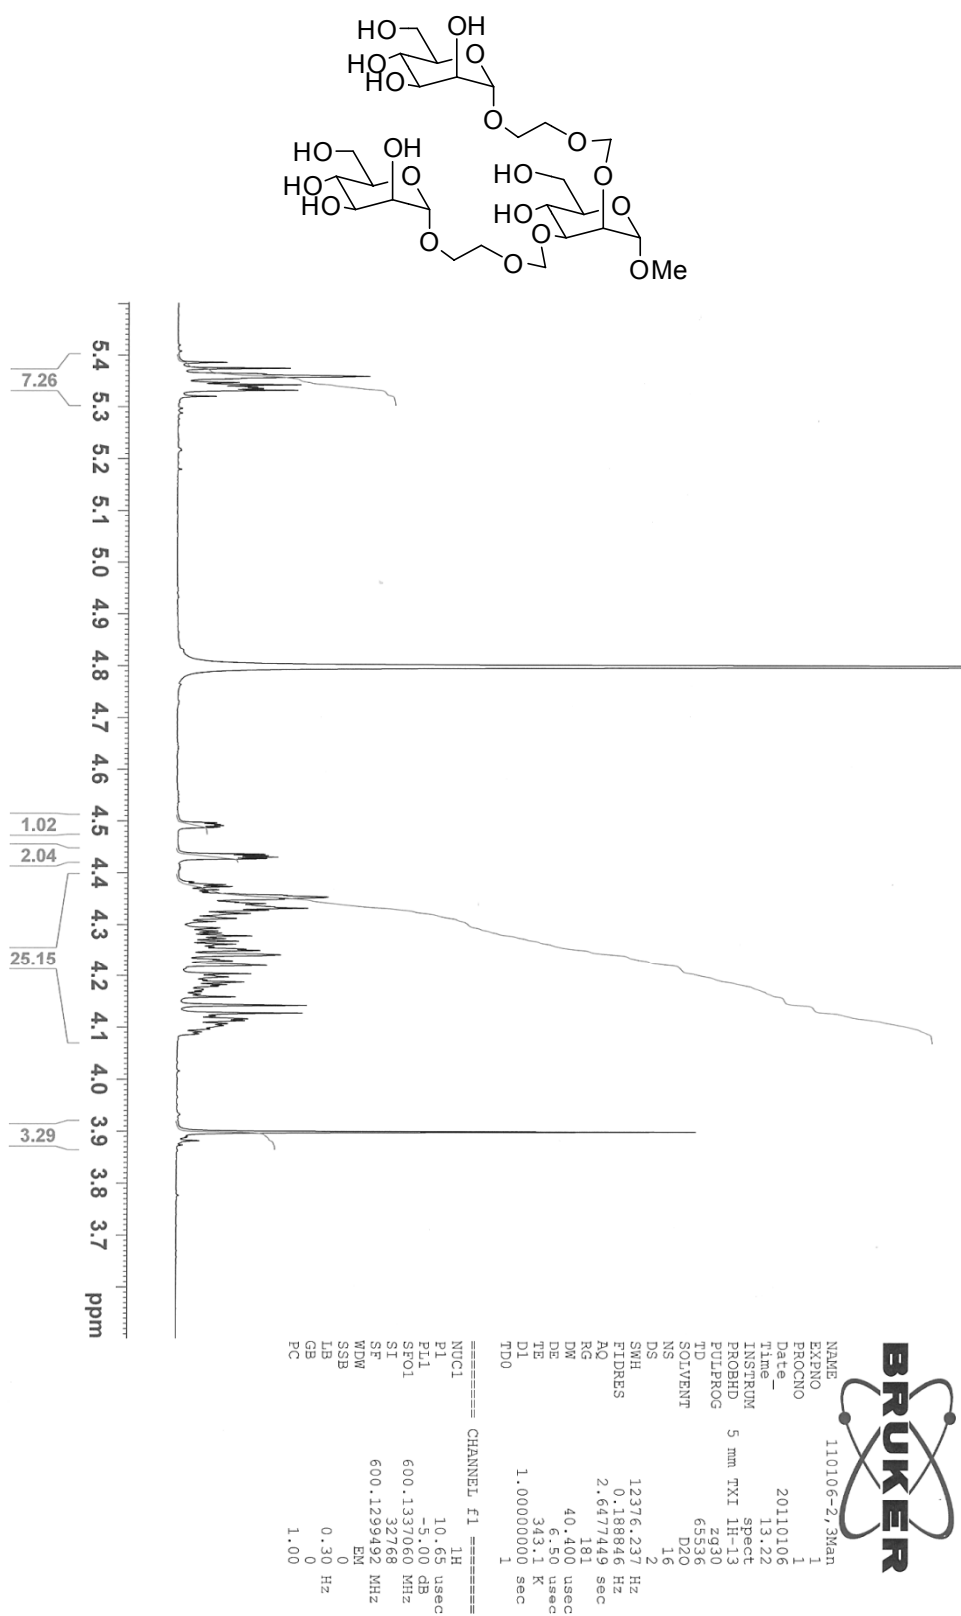

Fig S19. <sup>1</sup>H NMR of compound 18.

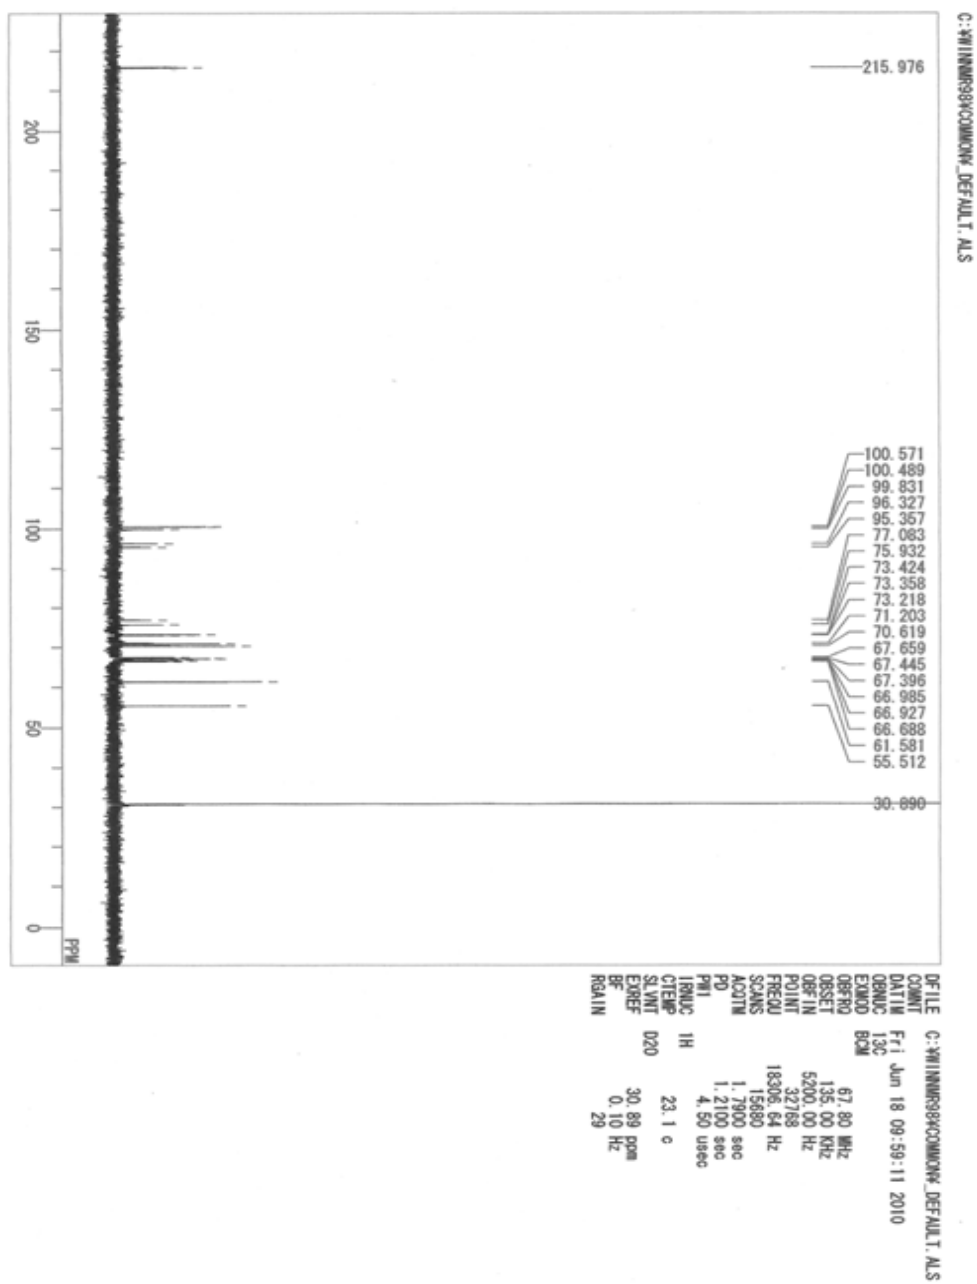

Fig S20.  $^{13}\text{C}$  NMR of compound 18.

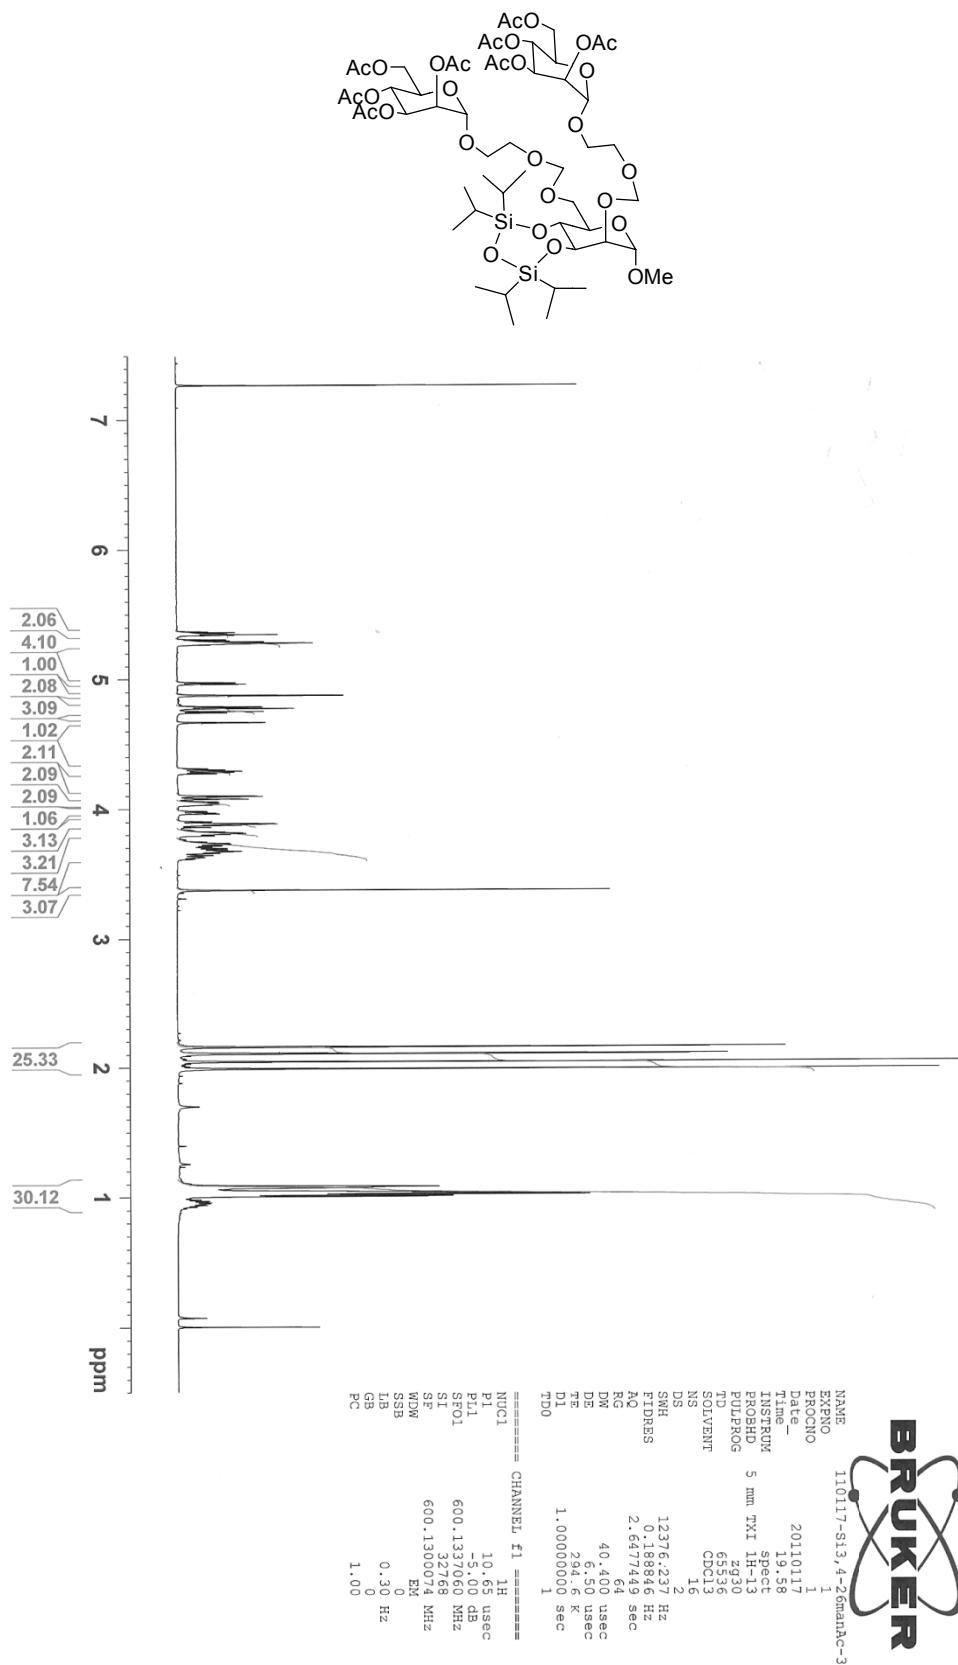

Fig S21. <sup>1</sup>H NMR of compound 20.

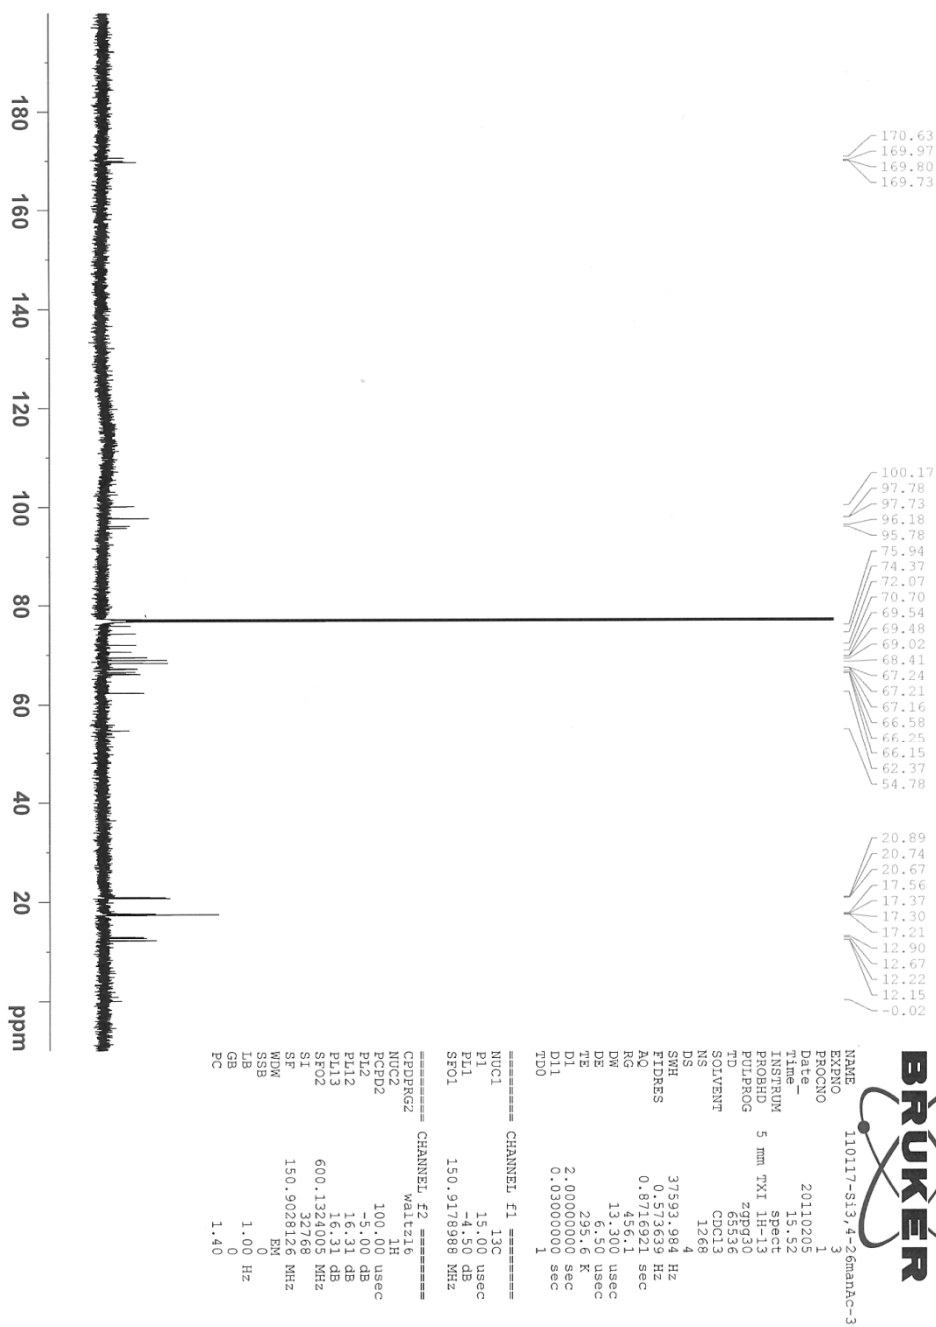

Fig S22.  $^{13}\text{C}$  NMR of compound 20.

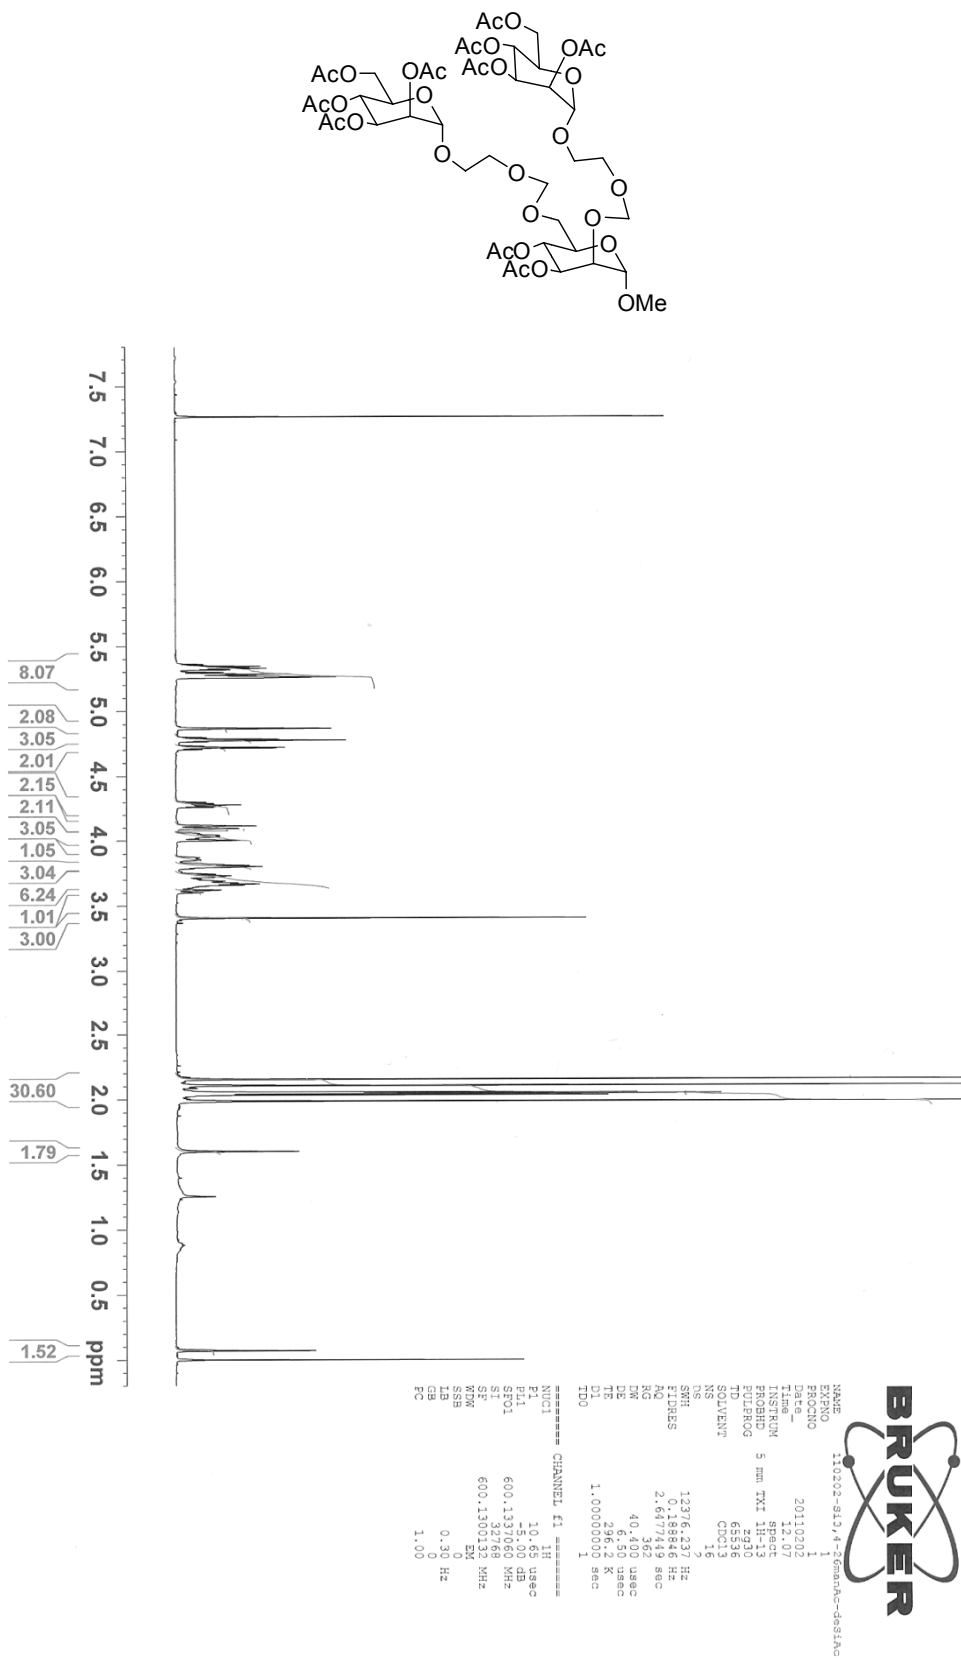

Fig S23. <sup>1</sup>H NMR of compound 22.



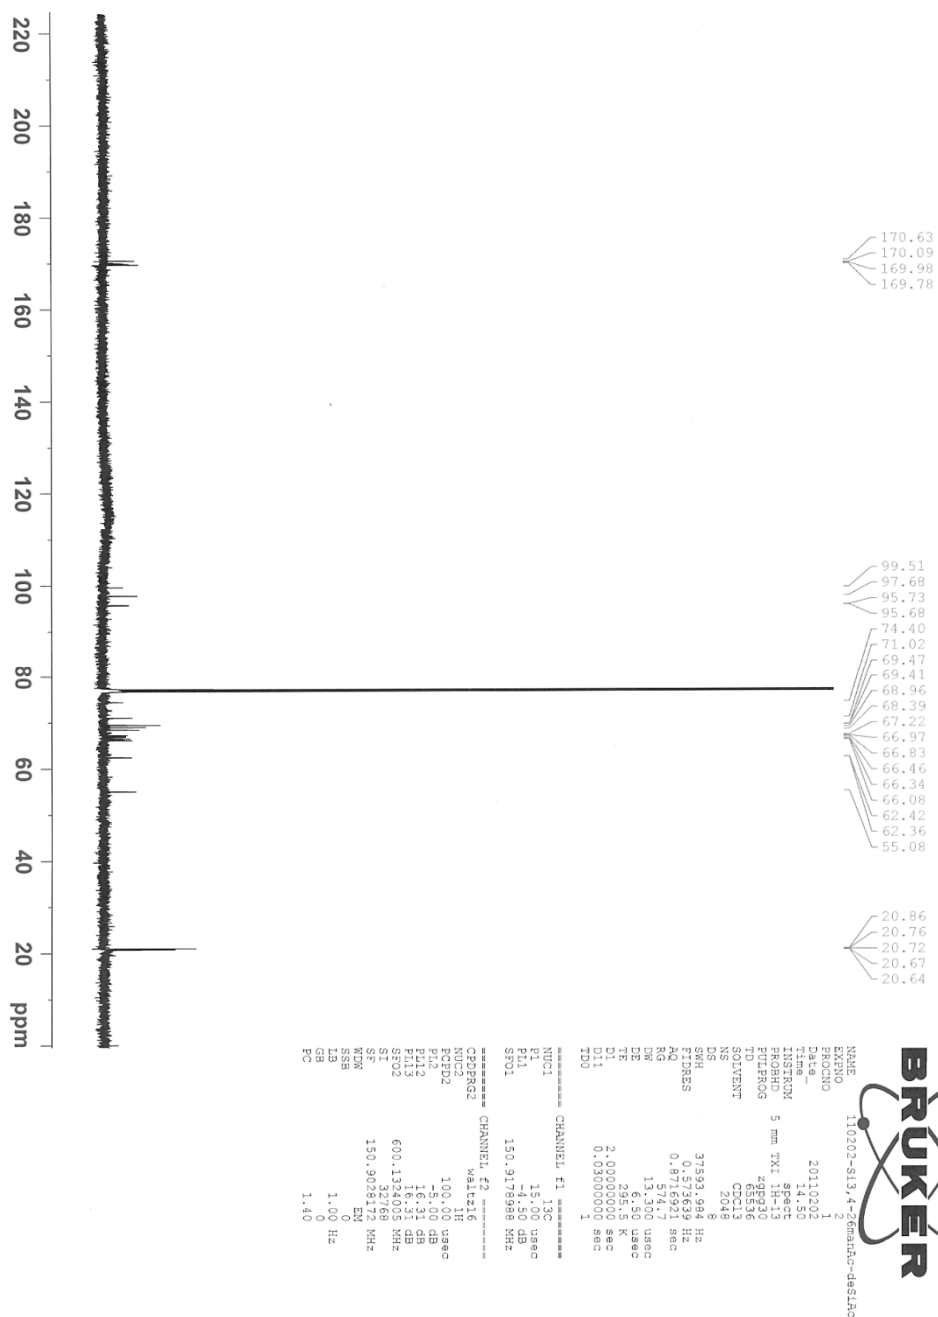

Fig S24.  $^{13}\text{C}$  NMR of compound **22**.

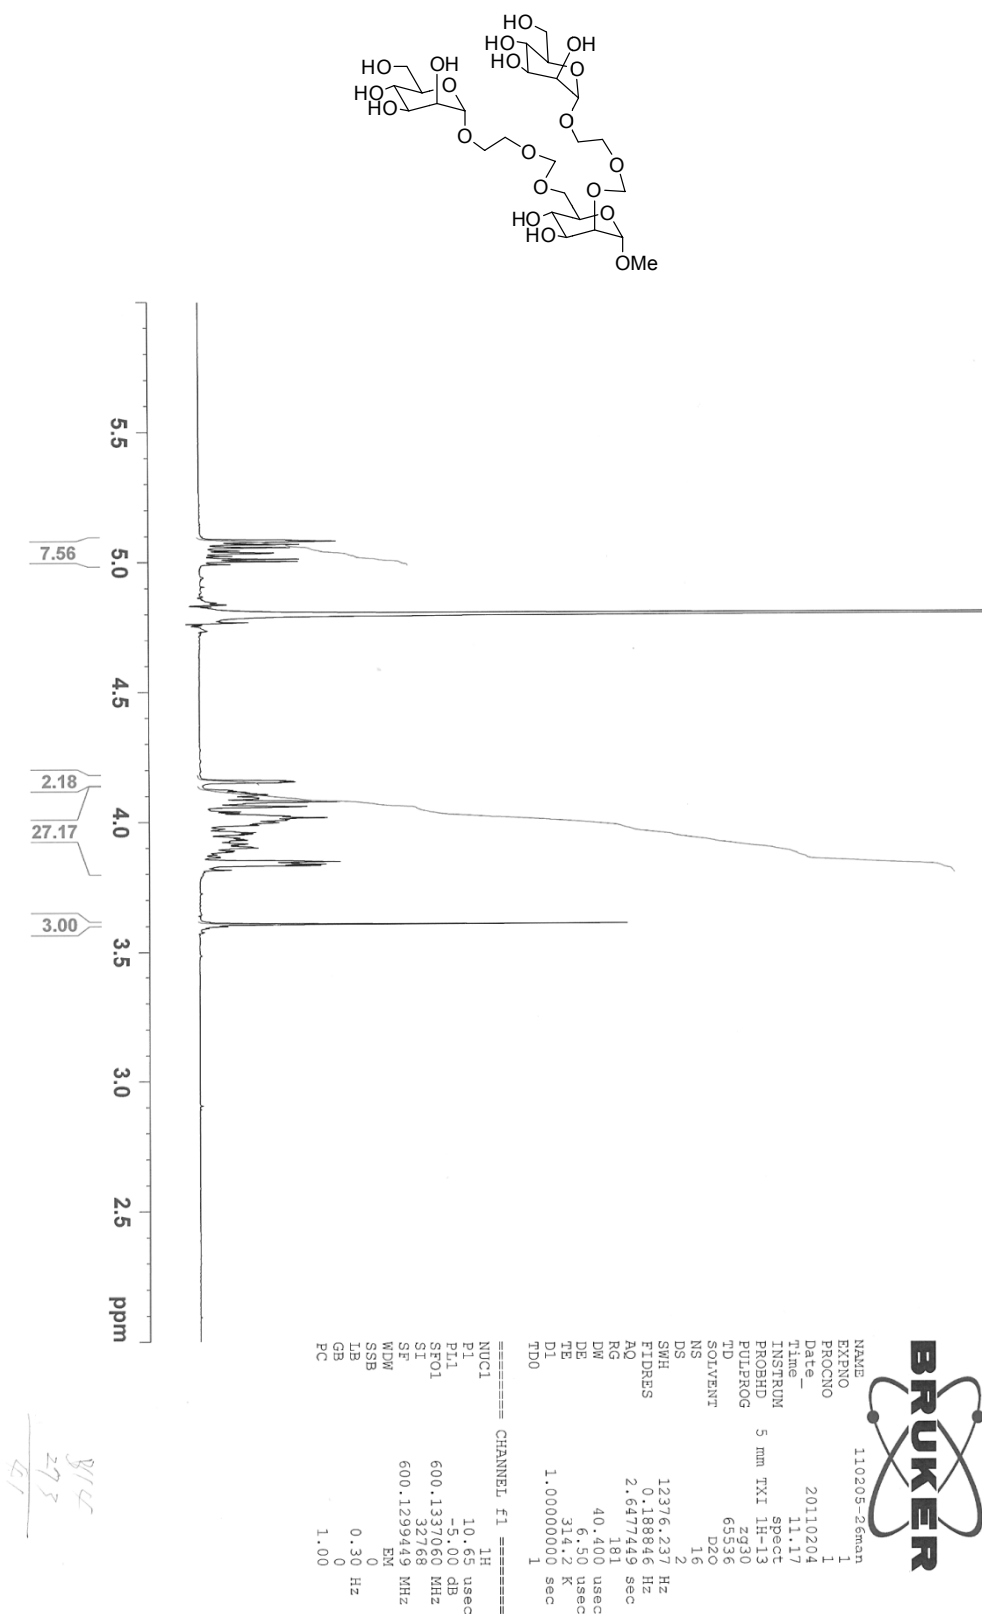

Fig S25. <sup>1</sup>H NMR of compound 23.

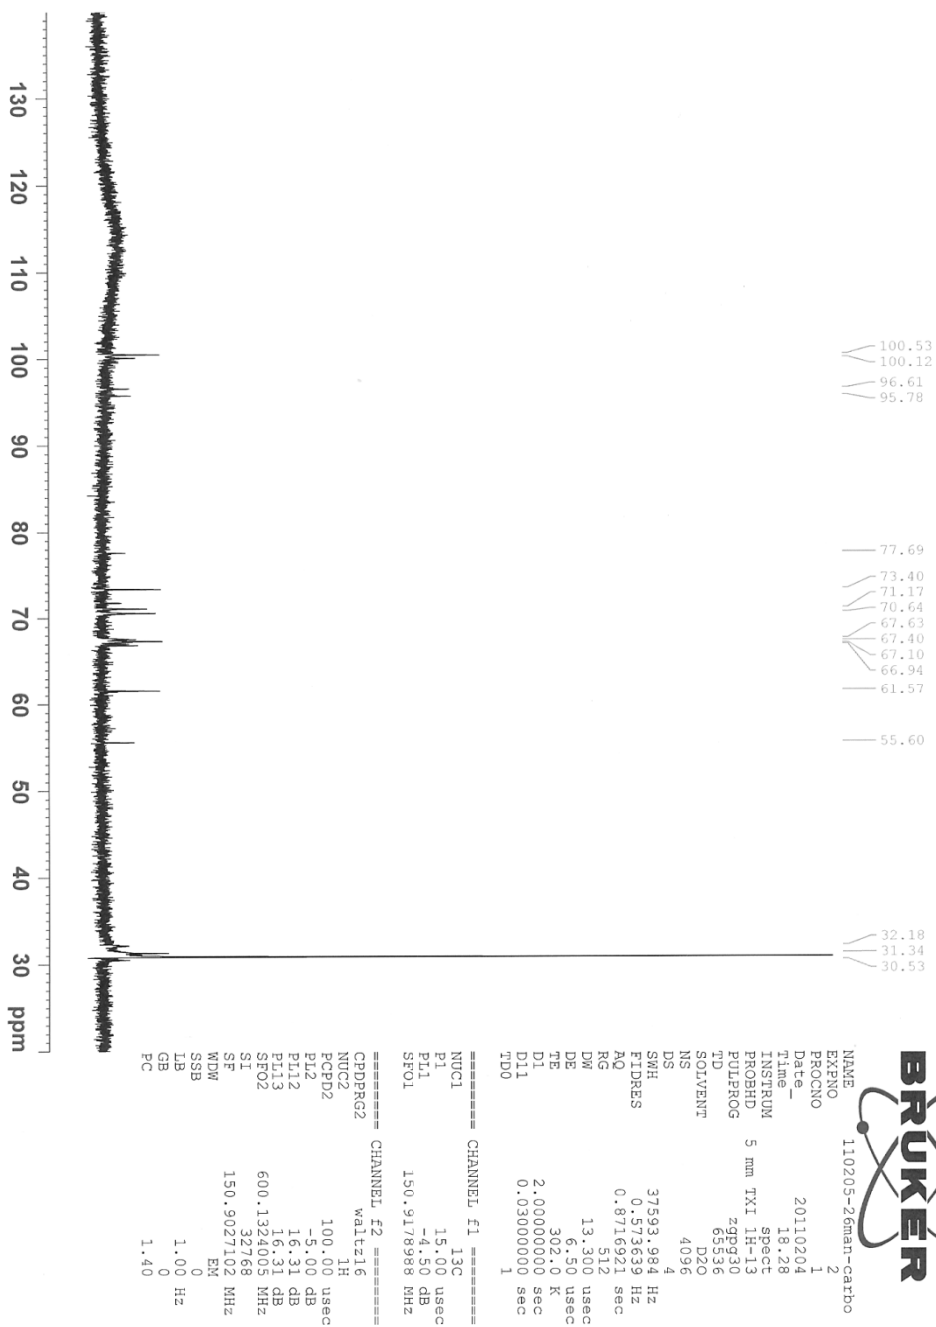

Fig S26.  $^{13}\text{C}$  NMR of compound 23.
